# Supplementary material for: The phylogenomics of CRISPR-Cas system and revelation of its features in Salmonella
Source: PubMed Central journal article supplement (PMC7712790; doi:10.1038/s41598-020-77890-6), 2020-12-03
Supplement: 41598_2020_77890_MOESM1_ESM.pdf [file 41598_2020_77890_MOESM1_ESM.pdf]

**Supplementary material for “The Phylogenomics of CRISPR-Cas System and  
revelation of its features in *Salmonella*”**

Simran Krishnakant Kushwaha<sup>1\*</sup>, Narra Lakshmi Sai Bhavesh<sup>1#</sup>, Bahaa Abdella<sup>2,3#</sup>, Chandrajit  
Lahiri<sup>2</sup> and Sandhya Amol Marathe<sup>1\*</sup>

**Supplementary materials include:**

**Table S1-S8**

**Supplementary figure legends**

**Figures S1-S13**

**Supplementary Methodology**

**Supplementary Table S1. Name, accession number for whole genome sequence and spacer details for the strains analysed in the study.**

| STRAIN NAME                                       | ACCESSION NUMBER          | No. OF SPACERS- CRISPR1 | No. OF SPACERS- CRISPR2 | STRAIN NAME                                         | ACCESSION NUMBER                                                                     | No. OF SPACERS- CRISPR1 | No. OF SPACERS- CRISPR2 |
|---------------------------------------------------|---------------------------|-------------------------|-------------------------|-----------------------------------------------------|--------------------------------------------------------------------------------------|-------------------------|-------------------------|
| <i>Salmonella enterica</i> subsp. <i>enterica</i> |                           |                         |                         |                                                     |                                                                                      |                         |                         |
| Serovar Anatum                                    | Broad-host range          |                         |                         | Serovar Paratyphi A                                 | Host-restricted-Primates                                                             |                         |                         |
| <b>USDA-ARS-USMARC-1175</b>                       | <b>CP007483.2</b>         | <b>2</b>                | <b>26</b>               | <b>AKU 12601</b>                                    | <b>FM200053.1</b>                                                                    | <b>7</b>                | <b>3</b>                |
| USDA-ARS-USMARC-1676                              | CP014620.1                | 2                       | 19                      | <b>ATCC 11511</b>                                   | <b>CP019185.1</b>                                                                    | <b>7</b>                | <b>3</b>                |
| USDA-ARS-USMARC-1677                              | CP014663.2                | 2                       | 21                      | <b>ATCC 9150</b>                                    | <b>CP000026.1</b>                                                                    | <b>5</b>                | <b>3</b>                |
| USDA-ARS-USMARC-1727                              | CP014621.2                | 2                       | 12                      | Serovar Gallinarum                                  | Host-restricted- Poultry and other avians                                            |                         |                         |
| USDA-ARS-USMARC-1728                              | CP014664.1                | 2                       | 25                      | <b>28791</b>                                        | <b>AN931173.1</b>                                                                    | <b>2</b>                | <b>10</b>               |
| USDA-ARS-USMARC-1735                              | CP007584.2                | 8                       | 8                       | <b>9184</b>                                         | <b>CP019035.1</b>                                                                    | <b>2</b>                | <b>10</b>               |
| USDA-ARS-USMARC-1736                              | CP014657.1                | 8                       | 26                      | Serovar Pullorum                                    | Host-restricted- Poultry                                                             |                         |                         |
| USDA-ARS-USMARC-1765                              | CP014659.2                | 2                       | 21                      | <b>ATCC 9120</b>                                    | <b>CP012347.1</b>                                                                    | <b>2</b>                | <b>6</b>                |
| USDA-ARS-USMARC-1766                              | CP014663.1                | 8                       | 24                      | <b>S06084</b>                                       | <b>CP006576.1</b>                                                                    | <b>2</b>                | <b>2</b>                |
| USDA-ARS-USMARC-1781                              | CP014666.2                | 8                       | 20                      | Serovar Gallinarum/Pullorum                         | Host-restricted- Poultry                                                             |                         |                         |
| USDA-ARS-USMARC-1783                              | CP014661.1                | 2                       | 25                      | <b>CDC 1983-67</b>                                  | <b>CP003786.1</b>                                                                    | <b>2</b>                | <b>6</b>                |
| <b>ATCC BAA-1592</b>                              | <b>CP007531.1</b>         | <b>8</b>                | <b>20</b>               | <b>RKSS078</b>                                      | <b>CP003047.1</b>                                                                    | <b>2</b>                | <b>6</b>                |
| CDC 06-0532                                       | CP007211.2                | 8                       | 20                      | Serovar Typhimurium                                 | Broad-host range                                                                     |                         |                         |
| Serovar Enteritidis                               | Broad-host range          |                         |                         | USDA-ARS-USMARC-1808                                | CP014869.1                                                                           | 10                      | 26                      |
| <b>77-1427</b>                                    | <b>CP007598.1</b>         | <b>9</b>                | <b>8</b>                | USDA-ARS-USMARC-1810                                | CP014882.2                                                                           | 21                      | 31                      |
| CDC 2010K_0968                                    | CP007528.1                | 9                       | 11                      | USDA-ARS-USMARC-1880                                | CP014981.1                                                                           | 11                      | 35                      |
| EC20090641                                        | CP007249.2                | 9                       | 11                      | USDA-ARS-USMARC-1896                                | CP014977.1                                                                           | 28                      | 24                      |
| EC20090699                                        | CP007248.1                | 9                       | 11                      | USDA-ARS-USMARC-1898                                | CP014971.2                                                                           | 22                      | 32                      |
| EC20110221                                        | CP007247.1                | 9                       | 11                      | USDA-ARS-USMARC-1899                                | CP007235.2                                                                           | 8                       | 19                      |
| EC20110354                                        | CP007175.1                | 9                       | 12                      | <b>str. 14028S</b>                                  | <b>CP001363.1</b>                                                                    | <b>22</b>               | <b>26</b>               |
| EC20110355                                        | CP007250.1                | 9                       | 12                      | <b>str. 798</b>                                     | <b>CP003386.1</b>                                                                    | <b>22</b>               | <b>22</b>               |
| EC20110356                                        | CP007262.1                | 9                       | 12                      | CDC 2009K-1640                                      | CP014975.1                                                                           | 10                      | 26                      |
| EC20110357                                        | CP007261.1                | 9                       | 11                      | CDC 2009K-2020                                      | CP014983.1                                                                           | 28                      | 24                      |
| EC20110358                                        | CP007260.1                | 9                       | 11                      | CDC 2010K-1587                                      | CP014985.1                                                                           | 27                      | 24                      |
| EC20110360                                        | CP007258.1                | 9                       | 12                      | CDC 2011K-0870                                      | CP007523.1                                                                           | 11                      | 34                      |
| EC20110361                                        | CP007263.1                | 9                       | 12                      | CDC 2011K-1702                                      | CP014967.1                                                                           | 10                      | 26                      |
| EC20111095                                        | CP007254.1                | 9                       | 12                      | D23580                                              | LS997973.1                                                                           | 21                      | 18                      |
| EC20111174                                        | CP007253.1                | 9                       | 12                      | <b>DT104</b>                                        | <b>HG37208.1</b>                                                                     | <b>10</b>               | <b>26</b>               |
| EC20111175                                        | CP007252.1                | 9                       | 12                      | DT2                                                 | HG326213.1                                                                           | 20                      | 26                      |
| EC20120002                                        | CP007329.2                | 9                       | 12                      | L-3553                                              | AP014565.1                                                                           | 22                      | 15                      |
| <b>EC 20120005</b>                                | <b>CP007267.2</b>         | <b>9</b>                | <b>12</b>               | <b>SARA13</b>                                       | <b>CP017228.1</b>                                                                    | <b>17</b>               | <b>25</b>               |
| EC20120008                                        | CP007243.1                | 9                       | 11                      | <b>SL1244</b>                                       | <b>FG031003.1</b>                                                                    | <b>14</b>               | <b>23</b>               |
| EC20121175                                        | CP007269.2                | 9                       | 12                      | SI474                                               | CP002487.1                                                                           | 14                      | 23                      |
| <b>P125109</b>                                    | <b>AN931172.1</b>         | <b>8</b>                | <b>10</b>               | T000240                                             | AP011957.1                                                                           | 20                      | 32                      |
| Serovar Saintpaul                                 | Broad-host range          |                         |                         | UK-1                                                | CP002614.1                                                                           | 14                      | 23                      |
| <b>CFSAN004173</b>                                | <b>CP019204.1</b>         | <b>15</b>               | <b>20</b>               | CFSAN001921                                         | CP006048.1                                                                           | 27                      | 24                      |
| CFSAN004174                                       | CP019206.1                | 15                      | 20                      | Serovar Senftenberg                                 | Host-restricted-Primates                                                             |                         |                         |
| CFSAN004175                                       | CP019172.1                | 15                      | 20                      | <b>NC15772</b>                                      | <b>NZ_LGV_R01000002.1</b>                                                            | <b>4</b>                | <b>1</b>                |
| SGB23                                             | CP023166.1                | 11                      | 22                      | Serovar Tennessee                                   | Broad-host range                                                                     |                         |                         |
| <b>SARA26</b>                                     | <b>CP017277.1</b>         | <b>41</b>               | <b>22</b>               | <b>ATCC 10722</b>                                   | <b>CP025218.1</b>                                                                    | <b>63</b>               | <b>23</b>               |
| Serovar Heidelberg                                | Broad-host range          |                         |                         | CFSAN001387                                         | CP014994.1                                                                           | 47                      | 23                      |
| CFSAN002064                                       | CP005993.1                | 25                      | 18                      | CFSAN070643                                         | CP024168.1                                                                           | 63                      | 23                      |
| <b>41578</b>                                      | <b>CP006086.1</b>         | <b>25</b>               | <b>16</b>               | CFSAN076210                                         | CP033345.1                                                                           | 47                      | 21                      |
| B182                                              | CP003416.1                | 25                      | 18                      | PIR00537                                            | CP025217.1                                                                           | 47                      | 23                      |
| <b>CFSAN002069</b>                                | <b>CP006590.2</b>         | <b>25</b>               | <b>18</b>               | CFSAN070645                                         | CP024164.1                                                                           | 49                      | 21                      |
| <b>SARA35</b>                                     | <b>CP019176.1</b>         | <b>25</b>               | <b>18</b>               | <b>TXSC - TXSC 08-19</b>                            | <b>CP007505.1</b>                                                                    | <b>51</b>               | <b>23</b>               |
| SL476                                             | CP001128.1                | 25                      | 18                      | Serovar Dublin                                      | Host-adapted/cattle                                                                  |                         |                         |
| Serovar Typhi                                     | Host-restricted- Primates |                         |                         | <b>CT_02821853</b>                                  | <b>CP001144.1</b>                                                                    | <b>2</b>                | <b>5</b>                |
| <b>Pstrv-12</b>                                   | <b>CP003278.1</b>         | <b>6</b>                | <b>1</b>                | Serovar Paratyphi C                                 | Host-restricted- Primates (not frequent) and known to infect other animals like pigs |                         |                         |
| <b>Ty2</b>                                        | <b>AE014613.1</b>         | <b>6</b>                | <b>1</b>                | <b>RKS4594</b>                                      | <b>CP000857.1</b>                                                                    | <b>10</b>               | <b>9</b>                |
| <b>CT18</b>                                       | <b>AL513382.1</b>         | <b>6</b>                | <b>1</b>                | Serovar Montevideo                                  | Broad-host range                                                                     |                         |                         |
| 1016889                                           | LF040893.1                | 6                       | 1                       | <b>CFSAN051296</b>                                  | <b>CP029336.1</b>                                                                    | <b>24</b>               | <b>17</b>               |
| 1036491                                           | LF040883.1                | 6                       | 1                       | <b>S31954</b>                                       | <b>CP029035.1</b>                                                                    | <b>24</b>               | <b>17</b>               |
| 1290235-M                                         | LF040883.1                | 6                       | 1                       | 507440-20                                           | CP007530.1                                                                           | 24                      | 17                      |
| ERL034151                                         | LF040867.1                | 7                       | 1                       | CDC 07-4954                                         | CP017974.1                                                                           | 11                      | 25                      |
| Serovar Newport II                                | Broad-host range          |                         |                         | CDC 08-1942                                         | CP017975.1                                                                           | 6                       | 21                      |
| <b>CVM 21558</b>                                  | <b>CP010282.1</b>         | <b>26</b>               | <b>19</b>               | CDC 2010K-0257                                      | CP020912.1                                                                           | 24                      | 17                      |
| CVM 21550                                         | CP010283.1                | 26                      | 19                      | CDC 2011K-1674                                      | CP017976.1                                                                           | 11                      | 21                      |
| CVM 22425                                         | CP010279.1                | 26                      | 19                      | CDC 2013K-1544                                      | CP017977.1                                                                           | 24                      | 17                      |
| CVM 22462                                         | CP010280.1                | 26                      | 19                      | CDC 2013K-0218                                      | CP017978.1                                                                           | 6                       | 21                      |
| <b>CVM 22513</b>                                  | <b>CP010281.1</b>         | <b>20</b>               | <b>19</b>               | FCC0123                                             | CP040379.1                                                                           | 4                       | 22                      |
| CVM N1543                                         | CP010284.1                | 26                      | 19                      | CDC 2009K-0792                                      | CP020752.1                                                                           | 35                      | 20                      |
| CVM N18486                                        | CP009561.1                | 17                      | 12                      | USDA-ARS-USMARC-1900                                | CP017970.1                                                                           | 36                      | 22                      |
| <b>SI_254</b>                                     | <b>CP001113.1</b>         | <b>26</b>               | <b>19</b>               | USDA-ARS-USMARC-1901                                | CP017971.1                                                                           | 34                      | 20                      |
| USMARC-S3124.1                                    | CP006631.1                | 26                      | 19                      | USDA-ARS-USMARC-1904                                | CP017972.1                                                                           | 33                      | 20                      |
| WA_14882                                          | CP010357.1                | 25                      | 19                      | USDA-ARS-USMARC-1912                                | CP017973.1                                                                           | 35                      | 16                      |
| Serovar Newport III                               | Broad-host range          |                         |                         | USDA-ARS-USMARC-1903                                | CP007222.1                                                                           | 35                      | 23                      |
| CFSAN001660                                       | CP016010.1                | 15                      | 20                      | USDA-ARS-USMARC-1921                                | CP007540.2                                                                           | 35                      | 23                      |
| CDC 2009K-1331                                    | CP025248.1                | 13                      | 16                      | <i>Salmonella enterica</i> subsp. <i>arizonae</i>   | Host-cold-blooded animals, mainly reptiles and sheeps                                |                         |                         |
| CDC 2012K-0938                                    | CP025246.1                | 4                       | 20                      | <b>NC121047</b>                                     | <b>LR134156.1</b>                                                                    | <b>23</b>               | <b>ABSENT</b>           |
| Levine 1                                          | CP015922.1                | 13                      | 19                      | <i>Salmonella enterica</i> subsp. <i>diarizonae</i> | Host-cold-blooded animals, mainly reptiles and sheeps                                |                         |                         |
| USDA-ARS-USMARC-1927                              | CP007216.2                | 18                      | 10                      | <b>SI_MZ0080</b>                                    | <b>CP022142.1</b>                                                                    | <b>29</b>               | <b>ABSENT</b>           |
| Levine 15                                         | CP015924.1                | 5                       | 16                      | <i>Salmonella bongori</i>                           | Host-cold-blooded animals, have been isolated from humans but very rare              |                         |                         |
| Serovar Agona                                     | Broad-host range          |                         |                         | <b>CFSAN005010</b>                                  | <b>CP045766.1</b>                                                                    | <b>20</b>               | <b>17</b>               |
| <b>SI_483</b>                                     | <b>CP001138.1</b>         | <b>18</b>               | <b>8</b>                | <b>NC121419</b>                                     | <b>LR134137.1</b>                                                                    | <b>20</b>               | <b>17</b>               |
| Serovar Bovismorbificans                          | Broad-host range          |                         |                         | <b>66 SA19983605</b>                                | <b>CP022120.1</b>                                                                    | <b>20</b>               | <b>17</b>               |
| <b>3114</b>                                       | <b>HF969015.2</b>         | <b>24</b>               | <b>15</b>               |                                                     |                                                                                      |                         |                         |

The strains represented in bold were considered for further analysis. The strains highlighted in grey for serovars Montevideo and Saintpaul represent the ones having distinct spacer sets.

Supplementary Table S2. The statistics of the spacer index for the serovars under consideration.

|                                                                                                                             |                                                     |                     | No. of strains analysed | CRISPR1* |         |         | CRISPR2* |         |         |
|-----------------------------------------------------------------------------------------------------------------------------|-----------------------------------------------------|---------------------|-------------------------|----------|---------|---------|----------|---------|---------|
|                                                                                                                             |                                                     |                     |                         | Minimum  | Maximum | Average | Minimum  | Maximum | Average |
| <i>Salmonella enterica</i> subsp. <i>enterica</i>                                                                           | Host-restricted                                     | Typhi               | 7                       | 6        | 7       | 6.14    | 1        | 1       | 1       |
|                                                                                                                             |                                                     | Paratyphi A         | 3                       | 5        | 7       | 6.33    | 3        | 3       | 3       |
|                                                                                                                             |                                                     | Gallinarum          | 2                       | 2        | 2       | 2       | 10       | 10      | 10      |
|                                                                                                                             |                                                     | Pullorum            | 2                       | 2        | 2       | 2       | 2        | 6       | 4       |
|                                                                                                                             |                                                     | Gallinarum/Pullorum | 2                       | 2        | 2       | 2       | 6        | 6       | 6       |
|                                                                                                                             |                                                     | Sendai              | 1                       | 4        | 4       | 4       | 1        | 1       | 1       |
|                                                                                                                             | Host-adapted                                        | Dublin              | 1                       | 2        | 2       | 2       | 5        | 5       | 5       |
|                                                                                                                             | Broad-host range                                    | Anatum              | 13                      | 2        | 8       | 4.77    | 8        | 26      | 20.25   |
|                                                                                                                             |                                                     | Paratyphi C         | 1                       | 10       | 10      | 10      | 9        | 9       | 9       |
|                                                                                                                             |                                                     | Heidelberg          | 6                       | 25       | 25      | 25      | 16       | 18      | 17.67   |
|                                                                                                                             |                                                     | Newport II          | 10                      | 17       | 26      | 24.4    | 12       | 19      | 18.3    |
|                                                                                                                             |                                                     | Newport III         | 6                       | 4        | 18      | 11.33   | 10       | 20      | 16.83   |
|                                                                                                                             |                                                     | Enteritidis         | 20                      | 8        | 9       | 8.95    | 8        | 12      | 11.35   |
|                                                                                                                             |                                                     | Typhimurium         | 23                      | 8        | 28      | 17.95   | 15       | 35      | 25.39   |
|                                                                                                                             |                                                     | Bovismorbificans    | 1                       | 24       | 24      | 24      | 15       | 15      | 15      |
|                                                                                                                             |                                                     | Tennessee           | 7                       | 41       | 63      | 52.43   | 21       | 23      | 22.14   |
|                                                                                                                             |                                                     | Montevideo          | 17                      | 4        | 36      | 23.59   | 16       | 25      | 19.94   |
|                                                                                                                             |                                                     | Saintpaul           | 5                       | 11       | 41      | 19.4    | 20       | 22      | 20.8    |
|                                                                                                                             |                                                     | Agona               | 1                       | 18       | 18      | 18      | 8        | 8       | 8       |
| Cold-blooded hosts                                                                                                          | <i>Salmonella enterica</i> subsp. <i>arizonae</i>   | 1                   | 23                      | 23       | 23      |         | -        | -       |         |
|                                                                                                                             | <i>Salmonella enterica</i> subsp. <i>diarizonae</i> | 1                   | 29                      | 29       | 29      |         | -        | -       |         |
|                                                                                                                             | <i>Salmonella bongori</i>                           | 3                   | 20                      | 20       | 20      | 17      | 17       | 17      |         |
| Total                                                                                                                       |                                                     |                     |                         |          | 15.29   |         |          | 12.58   |         |
| * Each serovar has one CRISPR1 and one CRISPR2 array except <i>S. enterica</i> subsp. <i>arizonae</i> and <i>diarizonae</i> |                                                     |                     |                         |          |         |         |          |         |         |

**Supplementary Table S3. Name and accession number for whole genome sequence for the strains analysed in the study.**

| SPECIES                                                                           | ACCESSION NUMBER | ABBREVIATION |
|-----------------------------------------------------------------------------------|------------------|--------------|
| <i>Salmonella bongori</i> str. 66 SA19983605                                      | CP022120.1       | SB           |
| <i>Salmonella enterica</i> subsps. <i>arizonae</i> str. NCTC10047                 | LR134156.1       | SE-A         |
| <i>Salmonella enterica</i> subsps. <i>diarizonae</i> 50 MZ0080                    | CP022142.1       | SE-D         |
| <i>Salmonella enterica</i> subsp. <i>enterica</i> serovar Typhimurium str. 14028s | CP001363.1       | STM1         |
| <i>Salmonella enterica</i> subsp. <i>enterica</i> serovar Typhimurium str. SARA13 | CP017728.1       | STM2         |
| <i>Salmonella enterica</i> subsp. <i>enterica</i> serovar Typhi str. Ty2          | AE014613.1       | STY1         |
| <i>Salmonella enterica</i> subsp. <i>enterica</i> serovar Typhi str. CT18         | AL513382.1       | STY2         |
| <i>Salmonella enterica</i> subsp. <i>enterica</i> serovar Newport str. CVM21538   | CP010282.1       | SE-NP1       |
| <i>Salmonella enterica</i> subsp. <i>enterica</i> serovar Newport str. CVM22513   | CP010281.1       | SE-NP2       |
| <i>Klebsiella pneumoniae</i> subsp. <i>pneumoniae</i> strain TGH10                | CP012744.1       | KP1          |
| <i>Klebsiella pneumoniae</i> strain INF235-sc-2280127                             | CP031817.1       | KP2          |
| <i>Shigella boydii</i> strain ATCC 49812                                          | CP026836.1       | SB1          |
| <i>Citrobacter freundii</i> complex sp. CFNIH3                                    | CP026235.1       | C1           |
| <i>Citrobacter freundii</i> complex sp. CFNIH9                                    | CP026238.1       | C2           |
| <i>Citrobacter</i> sp. 30_2                                                       | CP022311.1       | C3           |
| <i>Escherichia coli</i> strain 52148                                              | CP050382.1       | EC1          |
| <i>Escherichia coli</i> strain SCU-118                                            | CP051716.1       | EC2          |

The CRISPR1 leader sequences of these strains were used for the phylogenetic analysis. The abbreviations are the key to the figure.

**Supplementary Table S4. Strains of *Klebsiella*, *Escherichia* and *Shigella* matching with CRISPR1-STM leader and *cas*-STM.**

|                    | <i>Escherichia</i> | <i>Klebsiella</i> | <i>Shigella</i> |
|--------------------|--------------------|-------------------|-----------------|
| CRISPR1-STM Leader | 491                | 105               | 12              |
| Cas-STM            | ~1000              | ~100              | ~50             |

Values indicate number of strains.

**Supplementary Table S5. MGE candidates flanking the CRISPR-Cas system.**

|                                          | Genome location (Loci start and Loci end) |                 |                 | MGE<br>Transposase/<br>Helicase        | Percentage GC Content |                      |              |            |                 |
|------------------------------------------|-------------------------------------------|-----------------|-----------------|----------------------------------------|-----------------------|----------------------|--------------|------------|-----------------|
|                                          | CRISPR2                                   | <i>cas</i>      | CRISPR1         |                                        | CRISPR2 loci          | <i>cas</i><br>operon | CRISPR1 loci | CRISPR-Cas | Whole<br>genome |
| Paratyphi A str. AKU_12601               | 2902111-2902322                           | 2885645-2894598 | 2885105-2885560 | 2856664-2857091 and<br>3007579-3008037 | 51.3*                 | 49.9                 | 53.2*        | 49         | 52.18           |
| Newport II str. SL254                    | 3073142-3074328                           | 3056558-3064452 | 3054859-3056473 | 3024723-3025160                        | 54.2                  | 50.4                 | 55.6         | 51         | 52.22           |
| Newport III str. USDA-ARS-USMARC-1927    | 975001-975639                             | 983339-991789   | 991886-993012   | 1020178-1020414                        | 51.3                  | 52                   | 57.2         | 51         | 52.18           |
| Heidelberg str. SL476                    | 3069137-3070263                           | 3052976-3061435 | 3051217-3052879 | 3022734-3022874                        | 56.3                  | 53.1                 | 56.2         | 53         | 52.07           |
| Enteritidis str. EC20121175              | 2967508-2968269                           | 2951453-2959906 | 2950779-2951356 | 2923727-2923816                        | 55.8                  | 52.8                 | 55.7         | 51         | 52.17           |
| Gallinarum str. 9184                     | 1224776-1225415                           | 1233429-1241471 | 1241469-1241716 | 1271625-1271848                        | 56.8                  | 53.3                 | 47.6*        | 51         | 52.2            |
| Pullorum str. ATCC 9120                  | 3871330-3871722                           | 3855356-3863734 | 3855036-3855283 | 3827981-3828070                        | 53.6*                 | 52.9                 | 48.4*        | 51         | 52.19           |
| Gallinarum/Pullorum str. CDC1983-67      | 2947545-2947937                           | 2931570-2939948 | 2931250-2931497 |                                        | 53.6*                 | 52.9                 | 48.4*        | 51         | 52.23           |
| Montevideo-STY str. USDA-ARS-USMARC-1900 | 1003049-1004420                           | 1011949-1021097 | 1021182-1023406 | 1050505-1050672                        | 57.7                  | 50.4                 | 57           | 52         | 52.35           |
| Montevideo-STM str. CDC 2010K-0257       | 992948-994014                             | 1010602-1010052 | 1010149-1011641 | 1038743-1038910                        | 56.6                  | 52.4                 | 55.9         | 51         | 52.21           |
| Bovismorbificans str. 3114               | 2976895-2977839                           | 2960410-2969354 | 2958839-2960331 |                                        | 54                    | 50                   | 55.6         | 50         | 52.16           |
| Anatum str. CDC 06-0532                  | 970192-971440                             | 979153-987612   | 987709-988225   | 1018009-1018429                        | 56.2                  | 52.8                 | 55.5         | 51         | 52.18           |
| Tennessee str. ATCC 10722                | 963889-965320                             | 972914-981858   | 981943-985815   | 1015542-1015960                        | 59.3                  | 50.4                 | 57.1         | 52         | 52.23           |
| Saintpaul-STM str. CFSAN004173           | 946615-947863                             | 955563-964025   | 964122-965066   | 993235-993458                          | 57.2                  | 52                   | 57.4         | 51         | 52.21           |
| Saintpaul-STY str. SARA26                | 944744-946114                             | 953779-962723   | 962808-965337   | 993600-993740                          | 58.2                  | 50.3                 | 56.5         | 51         | 52.05           |
| Dublin str. CT_02021853                  | 3137409-3137742                           | 3121348-3129807 | 3121100-3121350 | 3090967-3091107                        | 51.6*                 | 53                   | 44.6*        | 51         | 52.18           |
| Agona str. SL483                         | 3005517-3006033                           | 2989328-2997778 | 2988105-2989231 | 2956649-2956789 and<br>2975984-2977192 | 54.2                  | 52                   | 56.3         | 51         | 52.08           |
| Typhimurium str. CFSAN001921             | 473159-474652                             | 482228-490687   | 490784-492564   | 522104-522291 and<br>423309-425144     | 55.9                  | 50.4                 | 56.9         | 51         | 52.17           |
| Typhi str. CT18                          | 2943208-2943716                           | 2926652-2935104 | 2926182-2926567 | 2898592-2899034 and<br>3013615-3014073 | 39.8*                 | 50.4                 | 57.3         | 50         | 52.05           |
| Subsp. <i>arizonae</i>                   |                                           | 962736-971156   | 971253-972682   |                                        |                       | 52.9                 | 57.4         | 52         | 51.38           |
| Subsp. <i>diarizonae</i>                 |                                           | 1126557-1134989 | 1135086-1136883 |                                        |                       | 52.9                 | 56.7         | 53         | 51.54           |
| <i>S. bongori</i>                        | 922139-923204                             | 930621-939089   | 939186-940434   |                                        | 53.4                  | 52.4                 | 54.5         | 50         | 51.33           |

\*The lower GC content of CRISPR arrays due to the AT-rich leader sequences are represented by asterisks

**Supplementary Table S6. MGE present in the whole genome of *S. enterica* subsp. *enterica* serovar Typhimurium str. LT2 and serovar Typhi str. TY2**

| <i>Salmonella</i> Typhimurium str. LT2 |          |                       | <i>Salmonella</i> Typhi str. TY2 |          |                                                  |
|----------------------------------------|----------|-----------------------|----------------------------------|----------|--------------------------------------------------|
| Gene Start                             | Gene End |                       | Gene Start                       | Gene End |                                                  |
| 110002                                 | 112908   | Helicase              | 109791                           | 112697   | Helicase                                         |
| 218296                                 | 220783   | Helicase              | 115562                           | 116002   | putative IS element transposase                  |
| 340748                                 | 340953   | Transposase           | 116022                           | 117230   | putative IS element transposase                  |
| 341175                                 | 341460   | Integrase             | 271067                           | 271525   | transposase for insertion sequence element IS200 |
| 369198                                 | 369998   | Transposase           | 222741                           | 225182   | Helicase                                         |
| 405293                                 | 408272   | Helicase              | 280079                           | 280537   | transposase for insertion sequence element IS200 |
| 489948                                 | 490109   | Transposase           | 305010                           | 306344   | Helicase                                         |
| 537933                                 | 538874   | Transposase           | 464716                           | 465174   | transposase for insertion sequence element IS200 |
| 613596                                 | 613797   | Integrase             | 528278                           | 528736   | transposase for insertion sequence element IS200 |
| 613753                                 | 614167   | Transposase           | 673526                           | 673984   | transposase for insertion sequence element IS200 |
| 781631                                 | 782197   | Integrase             | 712019                           | 713779   | Helicase                                         |
| 885578                                 | 886953   | Helicase              | 1070157                          | 1070768  | Helicase                                         |
| 887150                                 | 889305   | Helicase              | 1070777                          | 1071787  | Helicase                                         |
| 962615                                 | 963952   | Transposase Integrase | 1139104                          | 1141014  | Helicase                                         |
| 969994                                 | 971585   | Helicase              | 1189317                          | 1189775  | transposase for insertion sequence element IS200 |
| 1025163                                | 1025627  | Transposase           | 1220753                          | 1221211  | transposase for insertion sequence element IS200 |
| 1026090                                | 1026773  | Transposase Integrase | 1265128                          | 1265586  | transposase for insertion sequence element IS200 |
| 1098231                                | 1099531  | Transposase Integrase | 1450560                          | 1451018  | transposase for insertion sequence element IS200 |
| 1166406                                | 1168476  | Helicase              | 1598822                          | 1602724  | Helicase                                         |
| 1214284                                | 1215158  | Helicase              | 1647002                          | 1647460  | transposase for insertion sequence element IS200 |
| 1731328                                | 1735230  | Helicase              | 1745409                          | 1745867  | transposase for insertion sequence element IS200 |
| 1748282                                | 1749655  | Helicase              | 1802131                          | 1802589  | transposase for insertion sequence element IS200 |
| 1918512                                | 1920433  | Helicase              | 1895018                          | 1895476  | transposase for insertion sequence element IS200 |
| 1956851                                | 1957174  | Transposase           | 1898230                          | 1898688  | transposase for insertion sequence element IS200 |
| 1957832                                | 1958200  | Integrase             | 1903289                          | 1905343  | Helicase                                         |
| 1967023                                | 1967919  | Integrase             | 1970990                          | 1972330  | Integrase                                        |
| 1990051                                | 1990071  | Helicase              | 2473258                          | 2473716  | transposase for insertion sequence element IS200 |
| 1990070                                | 1990693  | Helicase              | 2534377                          | 2534835  | transposase for insertion sequence element IS200 |
| 2045732                                | 2046196  | Transposase           | 2735202                          | 2736233  | Integrase                                        |
| 2324547                                | 2326307  | Helicase              | 3012372                          | 3012830  | transposase for insertion sequence element IS200 |
| 2579330                                | 2579794  | Transposase           | 3043685                          | 3045148  | Integrase                                        |
| 2622291                                | 2622652  | Transposase           | 3052442                          | 3053338  | Integrase                                        |
| 2731352                                | 2731902  | Transposase           | 3077594                          | 3078052  | transposase for insertion sequence element IS200 |
| 2775590                                | 2776825  | Integrase             | 3085185                          | 3085643  | transposase for insertion sequence element IS200 |
| 2782896                                | 2784240  | Helicase              | 3108025                          | 3108483  | transposase for insertion sequence element IS200 |
| 2876819                                | 2877844  | Integrase             | 3287491                          | 3289431  | Helicase                                         |
| 2878160                                | 2879237  | Integrase             | 3440746                          | 3442575  | Helicase                                         |
| 2900435                                | 2901318  | Integrase             | 3447448                          | 3449610  | Helicase                                         |
| 2905473                                | 2906075  | Integrase             | 3450462                          | 3451364  | Integrase                                        |
| 2906456                                | 2906923  | Integrase             | 3482595                          | 3483860  | Helicase                                         |
| 2907070                                | 2907343  | Transposase           | 3485500                          | 3487524  | Helicase                                         |
| 2908424                                | 2910413  | Helicase              | 3501128                          | 3502180  | Integrase                                        |
| 2910673                                | 2910984  | Transposase           | 3894835                          | 3896916  | Helicase                                         |
| 2910967                                | 2911847  | Transposase           | 4296365                          | 4297780  | Helicase                                         |
| 3081922                                | 3082490  | Transposase           | 4395333                          | 4396697  | Helicase                                         |
| 3084047                                | 3086721  | Helicase              | 4489831                          | 4490856  | Integrase                                        |
| 3144282                                | 3146128  | Helicase              | 4511590                          | 4512603  | Integrase                                        |
| 3146114                                | 3149659  | Helicase              | 4524556                          | 4525815  | Integrase                                        |
| 3152718                                | 3156100  | Helicase              | 4666742                          | 4668007  | Integrase                                        |
| 3194324                                | 3194788  | Transposase           | 4689323                          | 4693072  | Helicase                                         |
| 3204431                                | 3205339  | Integrase             | 4693110                          | 4695647  | Helicase                                         |
| 3317055                                | 3317570  | Helicase              |                                  |          |                                                  |
| 3446192                                | 3448132  | Helicase              |                                  |          |                                                  |
| 3635168                                | 3635632  | Transposase           |                                  |          |                                                  |
| 3936873                                | 3938974  | Helicase              |                                  |          |                                                  |
| 4049846                                | 4051066  | Integrase             |                                  |          |                                                  |
| 4119776                                | 4121800  | Helicase              |                                  |          |                                                  |
| 4123440                                | 4124705  | Helicase              |                                  |          |                                                  |
| 4153785                                | 4154702  | Integrase             |                                  |          |                                                  |
| 4155554                                | 4157716  | Helicase              |                                  |          |                                                  |
| 4162571                                | 4164418  | Helicase              |                                  |          |                                                  |
| 4466589                                | 4468022  | Helicase              |                                  |          |                                                  |
| 4559426                                | 4559890  | Transposase           |                                  |          |                                                  |
| 4702530                                | 4702982  | Transposase           |                                  |          |                                                  |
| 4731324                                | 4731619  | Integrase             |                                  |          |                                                  |
| 4731975                                | 4735496  | Helicase              |                                  |          |                                                  |

**Supplementary Table S7. Mapping protospacer sources of CRISPR spacers**

|                                                   |                                                     | Species             | CRISPR1                            |                                                |                      |                                     |                                             | CRISPR2                            |                                                |                      |                                     |                                             |
|---------------------------------------------------|-----------------------------------------------------|---------------------|------------------------------------|------------------------------------------------|----------------------|-------------------------------------|---------------------------------------------|------------------------------------|------------------------------------------------|----------------------|-------------------------------------|---------------------------------------------|
|                                                   |                                                     |                     | No. of spacers having protospacers | No. of spacers not displaying any protospacers | Total No. of spacers | Percent spacers having protospacers | Percent spacers not displaying protospacers | No. of spacers having protospacers | No. of spacers not displaying any protospacers | Total No. of spacers | Percent spacers having protospacers | Percent spacers not displaying protospacers |
| <i>Salmonella enterica</i> subsp. <i>enterica</i> | Host-restricted                                     | Typhi               | 5                                  | 2                                              | 7                    | 71.43                               | 28.57                                       | 1                                  | 0                                              | 1                    | 100.00                              | 0.00                                        |
|                                                   |                                                     | Paratyphi A         | 5                                  | 2                                              | 7                    | 71.43                               | 28.57                                       | 2                                  | 1                                              | 3                    | 66.67                               | 33.33                                       |
|                                                   |                                                     | Gallinarum          | 1                                  | 1                                              | 2                    | 50.00                               | 50.00                                       | 6                                  | 4                                              | 10                   | 60.00                               | 40.00                                       |
|                                                   |                                                     | Pullorum            | 2                                  | 1                                              | 3                    | 66.67                               | 33.33                                       | 3                                  | 3                                              | 6                    | 50.00                               | 50.00                                       |
|                                                   |                                                     | Gallinarum/Pullorum | 2                                  | 0                                              | 2                    | 100.00                              | 0.00                                        | 3                                  | 3                                              | 6                    | 50.00                               | 50.00                                       |
|                                                   |                                                     | Sendai              | 4                                  | 0                                              | 4                    | 100.00                              | 0.00                                        | 1                                  | 0                                              | 1                    | 100.00                              | 0.00                                        |
|                                                   | Host-adapted                                        | Dublin              | 1                                  | 1                                              | 2                    | 50.00                               | 50.00                                       | 2                                  | 3                                              | 5                    | 40.00                               | 60.00                                       |
|                                                   | Broad-host range                                    | Anatum              | 4                                  | 4                                              | 8                    | 50.00                               | 50.00                                       | 18                                 | 8                                              | 26                   | 69.23                               | 30.77                                       |
|                                                   |                                                     | Paratyphi C         | 6                                  | 4                                              | 10                   | 60.00                               | 40.00                                       | 4                                  | 5                                              | 9                    | 44.44                               | 55.56                                       |
|                                                   |                                                     | Heidelberg          | 18                                 | 7                                              | 25                   | 72.00                               | 28.00                                       | 13                                 | 5                                              | 18                   | 72.22                               | 27.78                                       |
|                                                   |                                                     | Newport II          | 16                                 | 11                                             | 27                   | 59.26                               | 40.74                                       | 15                                 | 6                                              | 21                   | 71.43                               | 28.57                                       |
|                                                   |                                                     | Newport III         | 10                                 | 8                                              | 18                   | 55.56                               | 44.44                                       | 12                                 | 9                                              | 21                   | 57.14                               | 42.86                                       |
|                                                   |                                                     | Enteritidis         | 4                                  | 5                                              | 9                    | 44.44                               | 55.56                                       | 9                                  | 3                                              | 12                   | 75.00                               | 25.00                                       |
|                                                   |                                                     | Typhimurium         | 16                                 | 13                                             | 29                   | 55.17                               | 44.83                                       | 25                                 | 12                                             | 37                   | 67.57                               | 32.43                                       |
|                                                   |                                                     | Bovismorbificans    | 17                                 | 7                                              | 24                   | 70.83                               | 29.17                                       | 9                                  | 6                                              | 15                   | 60.00                               | 40.00                                       |
|                                                   |                                                     | Tennessee           | 37                                 | 26                                             | 63                   | 58.73                               | 41.27                                       | 16                                 | 7                                              | 23                   | 69.57                               | 30.43                                       |
|                                                   |                                                     | Montevideo-STM      | 16                                 | 9                                              | 25                   | 64.00                               | 36.00                                       | 12                                 | 15                                             | 27                   | 44.44                               | 55.56                                       |
|                                                   |                                                     | Montevideo-STY      | 26                                 | 10                                             | 36                   | 72.22                               | 27.78                                       | 18                                 | 5                                              | 23                   | 78.26                               | 21.74                                       |
|                                                   |                                                     | Saintpaul-STM       | 10                                 | 5                                              | 15                   | 66.67                               | 33.33                                       | 13                                 | 9                                              | 22                   | 59.09                               | 40.91                                       |
|                                                   |                                                     | Saintpaul-STY       | 27                                 | 14                                             | 41                   | 65.85                               | 34.15                                       | 13                                 | 9                                              | 22                   | 59.09                               | 40.91                                       |
| Agona                                             | 8                                                   | 10                  | 18                                 | 44.44                                          | 55.56                | 5                                   | 3                                           | 8                                  | 62.50                                          | 37.50                |                                     |                                             |
| Cold-blooded hosts                                | <i>Salmonella enterica</i> subsp. <i>arizonae</i>   | 18                  | 5                                  | 23                                             | 78.26                | 21.74                               | NA                                          | NA                                 | NA                                             | NA                   | NA                                  |                                             |
|                                                   | <i>Salmonella enterica</i> subsp. <i>diarizonae</i> | 18                  | 11                                 | 29                                             | 62.07                | 37.93                               | NA                                          | NA                                 | NA                                             | NA                   | NA                                  |                                             |
|                                                   | <i>Salmonella bongori</i>                           | 9                   | 11                                 | 20                                             | 45.00                | 55.00                               | 9                                           | 8                                  | 17                                             | 52.94                | 47.06                               |                                             |
|                                                   |                                                     | AVERAGE             |                                    |                                                |                      | 63.92                               | 36.08                                       |                                    |                                                |                      | 64.07                               | 35.93                                       |
|                                                   |                                                     | STANDARD DEVIATION  |                                    |                                                |                      | 14.80                               | 14.80                                       |                                    |                                                |                      | 15.6                                | 15.6                                        |

**Supplementary Table S8. Mapping the ChIP-seq of Cas5 on the whole genome of *S. enterica* subsp. *enterica* serovar Typhimurium str. 14028S**

| ChIP-seq Peak Center | Gene name         | Function                                                                                                                                                                                                                                                                                      |
|----------------------|-------------------|-----------------------------------------------------------------------------------------------------------------------------------------------------------------------------------------------------------------------------------------------------------------------------------------------|
| 648399               | <i>entF</i>       | Enterobactin synthetase, component F <sup>1</sup>                                                                                                                                                                                                                                             |
| 658872               | <i>entE</i>       | Enterobactin synthetase, component E <sup>1</sup>                                                                                                                                                                                                                                             |
| 1482744              | <i>trtS</i>       | Tetrathionate sensor histidine kinase <sup>3</sup>                                                                                                                                                                                                                                            |
| 1048355              | <i>ompF</i>       | Forms pores that allow passive diffusion of small molecules across the outer membrane <sup>4</sup>                                                                                                                                                                                            |
| 2724461              | <i>seaA</i>       | Type III secretion system chaperone <sup>5</sup>                                                                                                                                                                                                                                              |
| 2747746              | <i>hmpA</i>       | Is involved in NO detoxification in an aerobic process, termed nitric oxide dioxygenase (NOD) reaction that utilizes O <sub>2</sub> and NAD(P)H to convert NO to nitrate, which protects the bacterium from various noxious nitrogen compounds <sup>6</sup>                                   |
| 2242087              | <i>wcaI</i>       | GDP-mannose mannosyl hydrolase <sup>7</sup>                                                                                                                                                                                                                                                   |
| 2937813              | <i>iroC</i>       | ABC transporter ATP-binding protein <sup>8</sup>                                                                                                                                                                                                                                              |
| 3042704              | <i>sptP</i>       | Effector proteins function to alter host cell physiology and promote bacterial survival in host tissues <sup>9</sup>                                                                                                                                                                          |
| 3210092              | <i>sttB</i>       | Fimbrial biogenesis outer membrane usher protein <sup>10</sup>                                                                                                                                                                                                                                |
| 3525028              | <i>sspA</i>       | Important for enteropathogenicity <sup>11</sup>                                                                                                                                                                                                                                               |
| 3815385              | <i>bcsA</i>       | Catalytic subunit of cellulose synthase. It polymerizes uridine 5'-diphosphate glucose to cellulose, which is produced as an extracellular component for mechanical and chemical protection at the onset of the stationary phase, when the cells exhibit multicellular behavior <sup>12</sup> |
| 3976737              | <i>mgfB</i>       | Mediates magnesium influx to the cytosol <sup>13</sup>                                                                                                                                                                                                                                        |
| 4161855              | <i>cyoA</i>       | Adenylate cyclase is involved in the regulation of cyclase activity by the carbon source <sup>14</sup>                                                                                                                                                                                        |
| 4547246              | <i>basS</i>       | Member of the two-component regulatory system BasS/BasR. Autophosphorylates and activates BasR by phosphorylation <sup>15</sup>                                                                                                                                                               |
| 4861926              | <i>sthD</i>       | Putative fimbrial subunit <sup>16</sup>                                                                                                                                                                                                                                                       |
| 4862974              | <i>sthB</i>       | Fimbrial assembly protein <sup>17</sup>                                                                                                                                                                                                                                                       |
| 28623                | <i>bcdF</i>       | Cell adhesion                                                                                                                                                                                                                                                                                 |
| 37110                |                   | putative 5'-nucleotidase                                                                                                                                                                                                                                                                      |
| 67716                |                   | putative citrate-sodium symporter                                                                                                                                                                                                                                                             |
| 74672                | <i>dispB</i>      | Catalyzes the conversion of 4-hydroxy-tetrahydrodipicolinate (HTPA) to tetrahydrodipicolinate                                                                                                                                                                                                 |
| 78290                | <i>carB</i>       | Carbamoyl-phosphate synthase large chain                                                                                                                                                                                                                                                      |
| 81565                | <i>caif</i>       | DNA binding                                                                                                                                                                                                                                                                                   |
| 85304                | <i>caib</i>       | Catalyzes the reversible transfer of the CoA moiety from gamma-butyrobetainyl-CoA to L-carnitine to generate L-carnitinyl-CoA and gamma-butyrobetaine.                                                                                                                                        |
| 113296               | <i>hepA</i>       | Transcription regulator that activates transcription by stimulating RNA polymerase (RNAP) recycling in case of stress conditions such as supercoiled DNA or high salt concentrations.                                                                                                         |
| 114993               | <i>polB</i>       | DNA polymerase                                                                                                                                                                                                                                                                                |
| 134582               | <i>leuL</i>       | Involved in control of the biosynthesis of leucine.                                                                                                                                                                                                                                           |
| 136070               | <i>leuO</i>       | Probable HTH-type transcriptional regulator                                                                                                                                                                                                                                                   |
| 137573               | <i>ilvI</i>       | Acetolactate synthase isozyme 3 large subunit                                                                                                                                                                                                                                                 |
| 162127               |                   |                                                                                                                                                                                                                                                                                               |
| 166935               | <i>hpfC</i>       | Protein transport protein                                                                                                                                                                                                                                                                     |
| 171781               |                   | putative cytoplasmic protein                                                                                                                                                                                                                                                                  |
| 188885               | <i>acnB</i>       | Acetate hydratase-Involved in the catabolism of short chain fatty acids                                                                                                                                                                                                                       |
| 254924               |                   | 30S ribosomal protein S2                                                                                                                                                                                                                                                                      |
| 259664               | <i>dar</i>        | Catalyzes the NADP-dependent rearrangement and reduction of 1-deoxy-D-xylulose-5-phosphate (DXP) to 2-C-methyl-D-erythritol 4-phosphate (MEP)                                                                                                                                                 |
| 260309               | <i>upsS</i>       | Ditrans,poly(cis-undecaprenyl)-diphosphate synthase <sup>6</sup>                                                                                                                                                                                                                              |
| 270914               | <i>dnaE</i>       | DNA polymerase III is a complex, multichain enzyme responsible for most of the replicative synthesis in bacteria.                                                                                                                                                                             |
| 283323               | <i>proS</i>       | Proline-tRNA ligase                                                                                                                                                                                                                                                                           |
| 284920               |                   |                                                                                                                                                                                                                                                                                               |
| 292686               | <i>rriH</i>       | -                                                                                                                                                                                                                                                                                             |
| 316369               |                   | putative cytoplasmic protein                                                                                                                                                                                                                                                                  |
| 331550               |                   | putative cytoplasmic protein                                                                                                                                                                                                                                                                  |
| 354530               | <i>fadE</i>       | Catalyzes the dehydrogenation of acyl-coenzymes A (acyl-CoAs) to 2-enoyl-CoAs, the first step of the beta-oxidation cycle of fatty acid degradation.                                                                                                                                          |
| 360797               |                   |                                                                                                                                                                                                                                                                                               |
| 385712               | <i>pseudogene</i> |                                                                                                                                                                                                                                                                                               |
| 391414               |                   | putative outer membrane protein                                                                                                                                                                                                                                                               |
| 444928               | <i>yafF</i>       | Fructokinase                                                                                                                                                                                                                                                                                  |
| 461724               | <i>tgt</i>        | Queuine tRNA-ribosyltransferase                                                                                                                                                                                                                                                               |
| 503419               | <i>tig</i>        | Involved in protein export. Acts as a chaperone by maintaining the newly synthesized protein in an open conformation.                                                                                                                                                                         |
| 510542               | <i>oxyD</i>       | Peptidoglycan isomerase                                                                                                                                                                                                                                                                       |
| 530680               | <i>acrB</i>       | Multidrug efflux pump subunit drug efflux protein complex with broad substrate specificity that uses the proton motive force to export substrates.                                                                                                                                            |
| 533628               | <i>acrA</i>       | Multidrug efflux pump subunit drug efflux protein complex with broad substrate specificity that uses the proton motive force to export substrates.                                                                                                                                            |
| 547471               |                   | hypothetical protein                                                                                                                                                                                                                                                                          |
| 565916               | <i>yhbO</i>       | NAD(P)-dependent oxidoreductase                                                                                                                                                                                                                                                               |
| 606034               | <i>lincD</i>      | Involved in the export and assembly of fimbrial subunits across the outer membrane.                                                                                                                                                                                                           |
| 704128               | <i>rvxD</i>       | Catalyzes cross-linking of the peptidoglycan cell wall                                                                                                                                                                                                                                        |
| 781326               | <i>ybgL</i>       | Catalyzes the cleavage of 5-oxoprolinone to form L-glutamate coupled to the hydrolysis of ATP to ADP and inorganic phosphate.                                                                                                                                                                 |
| 799842               | <i>sdhA</i>       | Succinate dehydrogenase flavoprotein                                                                                                                                                                                                                                                          |
| 805852               | <i>sueB</i>       | E2 component of the 2-oxoglutarate dehydrogenase (OGDH) complex which catalyzes the second step in the conversion of 2-oxoglutarate to succinyl-CoA and CO <sub>2</sub> .                                                                                                                     |
| 862272               | <i>bioF</i>       | Biotin-7-oxononanoate synthase                                                                                                                                                                                                                                                                |
| 911440               |                   | hypothetical protein                                                                                                                                                                                                                                                                          |
| 995967               | <i>flxK</i>       | Essential cell division protein that coordinates cell division and chromosome segregation.                                                                                                                                                                                                    |
| 1027515              | <i>ycaI</i>       | Lactamase_B domain-containing protein                                                                                                                                                                                                                                                         |
| 1071391              |                   |                                                                                                                                                                                                                                                                                               |
| 1086398              |                   | minor tail protein                                                                                                                                                                                                                                                                            |
| 1088277              |                   | attachment/invasion protein                                                                                                                                                                                                                                                                   |
| 1126386              | <i>helD</i>       | DNA Helicase                                                                                                                                                                                                                                                                                  |
| 1146356              |                   | hypothetical protein                                                                                                                                                                                                                                                                          |
| 1173716              |                   | putative transcriptional regulator                                                                                                                                                                                                                                                            |
| 1175296              |                   | putative sodium/glucose cotransporter                                                                                                                                                                                                                                                         |
| 1197202              | <i>mdoH</i>       | Involved in the biosynthesis of osmoregulated periplasmic glucans                                                                                                                                                                                                                             |
| 1230875              | <i>rluC</i>       | Ribosomal large subunit pseudouridine synthase C                                                                                                                                                                                                                                              |
| 1237741              | <i>yagG</i>       | Catalyzes the NADPH-dependent reduction of beta-ketoacyl-ACP substrates to beta-hydroxyacyl-ACP products, the first reductive step in the elongation cycle of fatty acid biosynthesis                                                                                                         |
| 1250794              | <i>nagZ</i>       | Plays a role in peptidoglycan recycling by cleaving the terminal beta-1,4-linked N-acetylglucosamine (GlcNAc)                                                                                                                                                                                 |
| 1319463              |                   | phage tail component H-like protein                                                                                                                                                                                                                                                           |
| 1339141              |                   |                                                                                                                                                                                                                                                                                               |
| 1362889              |                   |                                                                                                                                                                                                                                                                                               |
| 1371489              | <i>yeaH</i>       | -                                                                                                                                                                                                                                                                                             |
| 1379980              | <i>yeaA</i>       | Peptide methionine sulfoxide reductase                                                                                                                                                                                                                                                        |
| 1393323              | <i>argD_1</i>     | Catalyzes the transamination of N2-succinylornithine and alpha-ketoglutarate into N2-succinylglutamate semialdehyde and glutamate                                                                                                                                                             |
| 1409579              |                   | hypothetical protein                                                                                                                                                                                                                                                                          |
| 1427820              | <i>pheT</i>       | Phenylalanine-tRNA ligase beta subunit                                                                                                                                                                                                                                                        |
| 1435560              | <i>araH</i>       | Stereo-specific condensation of phosphoenolpyruvate (PEP) and D-erythrose-4-phosphate (E4P) giving rise to 3-deoxy-D-arabino-heptulosonate-7-phosphate (DAHP).                                                                                                                                |
| 1573929              | <i>ynfM</i>       | Permease                                                                                                                                                                                                                                                                                      |
| 1575922              | <i>mic</i>        | -                                                                                                                                                                                                                                                                                             |
| 1599510              | <i>yafG</i>       | NADP-dependent dehydrogenase with broad substrate specificity acting on 3-hydroxy acids                                                                                                                                                                                                       |
| 1609053              | <i>ydeA</i>       | Involved in the efflux of sugars.                                                                                                                                                                                                                                                             |
| 1613004              | <i>yneH</i>       | Glutaminase                                                                                                                                                                                                                                                                                   |
| 1620035              | <i>ylnG</i>       | Formate dehydrogenase allows E. coli to use formate as major electron donor during anaerobic respiration, when nitrate is used as electron acceptor                                                                                                                                           |
| 1707334              |                   | putative benzoate membrane transport protein                                                                                                                                                                                                                                                  |
| 1749855              |                   |                                                                                                                                                                                                                                                                                               |
| 1875758              | <i>narX</i>       | Sensor protein                                                                                                                                                                                                                                                                                |
| 1902575              |                   | putative cytochrome oxidase subunit I                                                                                                                                                                                                                                                         |
| 1966259              |                   |                                                                                                                                                                                                                                                                                               |
| 2022871              |                   |                                                                                                                                                                                                                                                                                               |
| 2152720              | <i>cbpP</i>       | Cobyrinic acid synthase Catalyzes amidations at positions B, D, E, and G on adenosylcobyrinic A,C-diamide. NH <sub>2</sub> groups are provided by glutamine, and one molecule of ATP is hydrolyzed for each amidation.                                                                        |
| 2174789              | <i>pduJ</i>       | Carboxysome shell protein                                                                                                                                                                                                                                                                     |
| 2286468              |                   |                                                                                                                                                                                                                                                                                               |
| 2328373              |                   |                                                                                                                                                                                                                                                                                               |
| 2340192              | <i>galS</i>       | Repressor of the <i>galP</i> operon. Binds galactose and D-fructose as inducers. GalS binds to an operator DNA sequence within its own coding sequence                                                                                                                                        |
| 2402408              | <i>cmf_1</i>      | Cytochrome c type biogenesis protein F1                                                                                                                                                                                                                                                       |
| 2454950              | <i>ois</i>        | Lipopolysaccharide core heptose(II)-phosphate phosphatase is involved in the pathway lipopolysaccharide metabolism, which is part of bacterial outer membrane biogenesis.                                                                                                                     |
| 2502812              | <i>pta</i>        | Involved in acetate metabolism                                                                                                                                                                                                                                                                |
| 2562245              | <i>pgtC</i>       | Required for PgtP expression, it may act jointly with the PgtA/PgtB signaling proteins.                                                                                                                                                                                                       |
| 2612828              | <i>hemF</i>       | Involved in the heme biosynthesis                                                                                                                                                                                                                                                             |
| 2615387              |                   | putative cytoplasmic protein                                                                                                                                                                                                                                                                  |
| 2676031              | <i>guoB</i>       | Catalyzes the conversion of inosine 5'-phosphate (IMP) to xanthosine 5'-phosphate (XMP), the first committed and rate-limiting step in the de novo synthesis of guanine nucleotides, and therefore plays an important role in the regulation of cell growth.                                  |
| 2690387              | <i>ratB</i>       | Involved in toxin-antitoxin system                                                                                                                                                                                                                                                            |
| 2696323              | <i>ratA</i>       | Ribosome association toxin                                                                                                                                                                                                                                                                    |
| 2708378              | <i>ispG</i>       | 4-hydroxy-3-methylbut-2-en-1-yl diphosphate synthase                                                                                                                                                                                                                                          |
| 2723080              |                   | putative inner membrane lipoprotein                                                                                                                                                                                                                                                           |
| 2759144              | <i>yfhK</i>       | Histidine Kinase                                                                                                                                                                                                                                                                              |
| 2772009              |                   | putative permease                                                                                                                                                                                                                                                                             |
| 2795645              |                   | phage tail component H-like protein                                                                                                                                                                                                                                                           |
| 2852910              | <i>rriG</i>       | -                                                                                                                                                                                                                                                                                             |
| 2878401              | <i>recV</i>       | May be involved in recombinational repair of damaged DNA                                                                                                                                                                                                                                      |
| 2932715              |                   |                                                                                                                                                                                                                                                                                               |



|         |               |                                                                                                                                                                                                                                          |
|---------|---------------|------------------------------------------------------------------------------------------------------------------------------------------------------------------------------------------------------------------------------------------|
| 2935299 | <i>hin</i>    | DNA-invertase hin                                                                                                                                                                                                                        |
| 2946034 |               |                                                                                                                                                                                                                                          |
| 2959109 | <i>ygaf</i>   | Multi functional fusion protein                                                                                                                                                                                                          |
| 2968949 |               | putative inner membrane protein                                                                                                                                                                                                          |
| 2993084 | <i>alaS</i>   | Catalyzes the attachment of alanine to tRNA (Ala)                                                                                                                                                                                        |
| 3007285 | <i>ygbd</i>   | One of at least two accessory proteins for anaerobic nitric oxide (NO) reductase                                                                                                                                                         |
| 3050276 | <i>truD</i>   | tRNA pseudouridine synthase D                                                                                                                                                                                                            |
| 3092114 |               | hypothetical protein                                                                                                                                                                                                                     |
| 3093634 | <i>cysN</i>   | Sulfate adenylyltransferase subunit 1-May be the GTPase, regulating ATP sulfurylase activity.                                                                                                                                            |
| 3110917 | <i>cysI</i>   | Component of the sulfite reductase complex that catalyzes the 6-electron reduction of sulfite to sulfide.                                                                                                                                |
| 3125034 | <i>rumA</i>   | 23S rRNA [uracil(2939)-C5]-methyltransferase                                                                                                                                                                                             |
| 3132946 | <i>ygqT</i>   | Glucuronate dehydratase                                                                                                                                                                                                                  |
| 3151410 | <i>glcU</i>   | Involved in the anomeric conversion of L-fucose.                                                                                                                                                                                         |
| 3153348 | <i>ygqE</i>   | Catalyzes the 2'-O-methylation at nucleotide C2498 in 23S rRNA.                                                                                                                                                                          |
| 3226541 | <i>ygqZ</i>   | tRNA modifying protein                                                                                                                                                                                                                   |
| 3227626 | <i>ygfA</i>   | Cytolysis                                                                                                                                                                                                                                |
| 3305087 |               | putative amino acid transporter                                                                                                                                                                                                          |
| 3335029 |               |                                                                                                                                                                                                                                          |
| 3408554 | <i>ygiQ</i>   | DUF218 domain-containing protein                                                                                                                                                                                                         |
| 3422879 | <i>yhoO</i>   | amino acid transmembrane transport                                                                                                                                                                                                       |
| 3435898 | <i>garL</i>   | Catalyzes the reversible retro-aldol cleavage of both 5-keto-4-deoxy-D-glucarate and 2-keto-3-deoxy-D-glucarate to pyruvate and tartronic semialdehyde.                                                                                  |
| 3468956 | <i>hfb</i>    | Translation initiation factor IF-2                                                                                                                                                                                                       |
| 3471285 | <i>yhcC</i>   | Ribosome maturation factor                                                                                                                                                                                                               |
| 3475670 | <i>glmM</i>   | Catalyzes the conversion of glucosamine-6-phosphate to glucosamine-1-phosphate                                                                                                                                                           |
| 3477559 | <i>fbp</i>    | Catalyzes the condensation of para-aminobenzoate (pABA) with 6-hydroxymethyl-7,8-dihydropterin diphosphate (DHPI-PP) to form 7,8-dihydropterate (H2Pte)                                                                                  |
| 3479495 | <i>hfbB</i>   | Acts as a processive, ATP-dependent zinc metalloproteinase for both cytoplasmic and membrane proteins.                                                                                                                                   |
| 3487508 | <i>ispB</i>   | Octaprenyl diphosphate synthase                                                                                                                                                                                                          |
| 3513963 | <i>gltD</i>   | Glutamate synthase                                                                                                                                                                                                                       |
| 3523435 | <i>yhcK</i>   | Hfh-type transcriptional repressor                                                                                                                                                                                                       |
| 3558707 |               | hypothetical protein                                                                                                                                                                                                                     |
| 3560950 | <i>yhdH</i>   | Putative oxidoreductase                                                                                                                                                                                                                  |
| 3583298 | <i>rrlD</i>   | "                                                                                                                                                                                                                                        |
| 3589371 | <i>smg</i>    | "                                                                                                                                                                                                                                        |
| 3602356 |               |                                                                                                                                                                                                                                          |
| 3618205 | <i>yheO</i>   | Putative reulator                                                                                                                                                                                                                        |
| 3619144 | <i>βpA</i>    | Peptidyl-prolyl cis-trans isomerase                                                                                                                                                                                                      |
| 3635929 |               | Hypothetical protein                                                                                                                                                                                                                     |
| 3658225 | <i>hgfQ</i>   | DNA transporter                                                                                                                                                                                                                          |
| 3685793 | <i>malQ</i>   | Transfers a segment of a [1->4]-alpha-D-glucan to a new position in an acceptor, which may be glucose or a [1->4]-alpha-D-glucan.                                                                                                        |
| 3690088 | <i>malP</i>   | Alpha-1,4 glucan phosphorylase                                                                                                                                                                                                           |
| 3729165 |               |                                                                                                                                                                                                                                          |
| 3773648 | <i>pitA</i>   | Phosphate transporter                                                                                                                                                                                                                    |
| 3783533 | <i>gor</i>    | Glutathione reductase                                                                                                                                                                                                                    |
| 3795727 | <i>yhjD</i>   | Inner membrane protein                                                                                                                                                                                                                   |
| 3820332 | <i>yhjU</i>   | Cellulose biosynthesis protein                                                                                                                                                                                                           |
| 3850991 |               | hypothetical protein                                                                                                                                                                                                                     |
| 3851150 |               |                                                                                                                                                                                                                                          |
| 3856794 |               | putative outer membrane lipoprotein                                                                                                                                                                                                      |
| 3862386 | <i>ylr</i>    | Catalyzes the phosphorylation of N-acetyl-D-glucosamine (GlcNAc) derived from cell-wall degradation, yielding GlcNAc-6-P                                                                                                                 |
| 3863537 | <i>box</i>    | "                                                                                                                                                                                                                                        |
| 3865552 | <i>malS</i>   | Alpha-amylase                                                                                                                                                                                                                            |
| 3878721 |               | putative regulatory protein                                                                                                                                                                                                              |
| 3904893 |               | Hypothetical protein                                                                                                                                                                                                                     |
| 3905779 |               | putative mandelate racemase                                                                                                                                                                                                              |
| 3934110 | <i>kdhA</i>   | Involved in lipopolysaccharide (LPS) biosynthesis.                                                                                                                                                                                       |
| 3940960 | <i>rph</i>    | Phosphorylytic exoribonuclease that removes nucleotide residues following the -CCA terminus of rRNA and adds nucleotides to the ends of RNA molecules by using nucleoside diphosphates as substrates.                                    |
| 3949816 | <i>spoT</i>   | βppGpp synthetase II                                                                                                                                                                                                                     |
| 3961073 | <i>yicI</i>   | MFS transporter                                                                                                                                                                                                                          |
| 3963291 |               | Hypothetical protein                                                                                                                                                                                                                     |
| 3990958 |               | putative glycosyl hydrolase                                                                                                                                                                                                              |
| 4029473 | <i>ccmF_2</i> | Cytochrome c type biogenesis protein F2                                                                                                                                                                                                  |
| 4043153 | <i>dgoT</i>   | D-galactonate transport protein                                                                                                                                                                                                          |
| 4058622 | <i>dnaA</i>   | Plays an important role in the initiation and regulation of chromosomal replication.                                                                                                                                                     |
| 4094038 | <i>atpI</i>   | ATP PFO1 synthase subunit I                                                                                                                                                                                                              |
| 4094227 | <i>atpI</i>   | ATP PFO1 synthase subunit I                                                                                                                                                                                                              |
| 4095913 | <i>glfA</i>   | NAD-binding protein involved in the addition of a carboxymethylaminomethyl (cmnm) group at the wobble position (U34) of certain tRNAs, forming tRNA-cmnmS2U34.                                                                           |
| 4116354 | <i>rrlC</i>   | "                                                                                                                                                                                                                                        |
| 4134314 | <i>rep</i>    | ATP-dependent DNA helicase                                                                                                                                                                                                               |
| 4151518 | <i>wecF</i>   | Catalyzes the synthesis of Und-PP-GlcNAc-ManNAcA-Fuc4NAc (lipid III), the third lipid-linked intermediate involved in ECA synthesis.                                                                                                     |
| 4162972 |               | putative inner membrane protein                                                                                                                                                                                                          |
| 4186636 |               | putative arylsulfatase regulator                                                                                                                                                                                                         |
| 4212456 | <i>rrlA</i>   | "                                                                                                                                                                                                                                        |
| 4230132 | <i>glfA</i>   | Catalyzes the ATP-dependent biosynthesis of glutamine from glutamate and ammonia.                                                                                                                                                        |
| 4242194 | <i>yihQ</i>   | Alpha-glucosidase                                                                                                                                                                                                                        |
| 4248738 | <i>yihV</i>   | Sulfofructose kinase                                                                                                                                                                                                                     |
| 4285755 |               |                                                                                                                                                                                                                                          |
| 4312781 | <i>hslU</i>   | ATPase subunit of a proteasome-like degradation complex; this subunit has chaperone activity.                                                                                                                                            |
| 4315832 | <i>cytR</i>   | DNA-binding transcriptional regulator                                                                                                                                                                                                    |
| 4341382 | <i>frwC</i>   | PTS system fructose-like IIC component                                                                                                                                                                                                   |
| 4345376 | <i>pfk</i>    | Pyruvate formate lyase II activase                                                                                                                                                                                                       |
| 4353316 | <i>argC</i>   | Catalyzes the NADPH-dependent reduction of N-acetyl-5-glutamyl phosphate to yield N-acetyl-L-glutamate 5-semialdehyde.                                                                                                                   |
| 4367423 | <i>rrlB</i>   | "                                                                                                                                                                                                                                        |
| 4383934 | <i>rpoC</i>   | DNA-dependent RNA polymerase catalyzes the transcription of DNA into RNA using the four ribonucleoside triphosphates as substrates.                                                                                                      |
| 4410803 | <i>rrlE</i>   | Probably a phage tail protein                                                                                                                                                                                                            |
| 4422051 | <i>meth</i>   | Methionine synthase                                                                                                                                                                                                                      |
| 4422597 | <i>meth</i>   | Methionine synthase                                                                                                                                                                                                                      |
| 4425744 |               |                                                                                                                                                                                                                                          |
| 4428326 |               | putative cytoplasmic protein                                                                                                                                                                                                             |
| 4453813 | <i>pgi</i>    | Glucose-6-phosphate isomerase                                                                                                                                                                                                            |
| 4498488 |               | putative inner membrane protein                                                                                                                                                                                                          |
| 4510031 |               | putative inner membrane protein                                                                                                                                                                                                          |
| 4512158 |               | putative inner membrane protein                                                                                                                                                                                                          |
| 4544554 |               |                                                                                                                                                                                                                                          |
| 4563616 | <i>dauS</i>   | Histidine kinase                                                                                                                                                                                                                         |
| 4599778 | <i>fadC</i>   | Two distinct, membrane-bound, FAD-containing enzymes are responsible for the catalysis of fumarate and succinate interconversion; fumarate reductase is used in anaerobic growth, and succinate dehydrogenase is used in aerobic growth. |
| 4601159 | <i>yjeM</i>   | Inner membrane transporter                                                                                                                                                                                                               |
| 4603171 | <i>yjeP</i>   | Mechanosensitive channel protein                                                                                                                                                                                                         |
| 4606105 | <i>psd</i>    | Catalyzes the formation of phosphatidylethanolamine (PtdEtn) from phosphatidylserine (PtdSer)                                                                                                                                            |
| 4608075 | <i>orn</i>    | 3'-to-5' exoribonuclease specific for small oligoribonucleotides                                                                                                                                                                         |
| 4619855 | <i>hfk</i>    | HRK could encode or regulate a protease                                                                                                                                                                                                  |
| 4630083 | <i>yjK</i>    | Putative cytoplasmic protein                                                                                                                                                                                                             |
| 4651224 | <i>yjG</i>    | Nrma domain-containing protein                                                                                                                                                                                                           |
| 4659723 | <i>yjM</i>    | Autotransporter assembly factor                                                                                                                                                                                                          |
| 4672673 |               | sugar transporter                                                                                                                                                                                                                        |
| 4687149 |               | putative carbohydrate kinase                                                                                                                                                                                                             |
| 4695198 | <i>pmbA</i>   | Metalloprotease PmbA                                                                                                                                                                                                                     |
| 4696115 | <i>cybC</i>   | Soluble cytochrome b562-Electron-transport protein of unknown function.                                                                                                                                                                  |
| 4725096 | <i>argI</i>   | Reversibly catalyzes the transfer of the carbamoyl group from carbamoyl phosphate (CP) to the N(epsilon) atom of ornithine (ORN) to produce L-ornithine.                                                                                 |
| 4743769 |               | putative DNA helicase                                                                                                                                                                                                                    |
| 4745250 |               | putative DNA helicase                                                                                                                                                                                                                    |
| 4747780 |               | putative DNA helicase                                                                                                                                                                                                                    |
| 4748007 |               | putative DNA helicase                                                                                                                                                                                                                    |
| 4778370 | <i>yjE</i>    | Cell density-dependent motility repressor                                                                                                                                                                                                |
| 4798141 | <i>mrr</i>    | Mrr_cat domain-containing protein                                                                                                                                                                                                        |
| 4804820 |               | putative transcriptional regulator                                                                                                                                                                                                       |
| 4821700 | <i>fluF</i>   | Ligase                                                                                                                                                                                                                                   |
| 4836394 | <i>deoA</i>   | The enzymes which catalyze the reversible phosphorolysis of pyrimidine nucleosides                                                                                                                                                       |
| 4847924 | <i>radA</i>   | DNA-dependent ATPase involved in processing of recombination intermediates, plays a role in repairing DNA breaks.                                                                                                                        |
| 4857384 | <i>creB</i>   | Response regulator in two-component regulatory system with CreC                                                                                                                                                                          |

Gene information was obtained from NCBI. The italicized sites don't match with any gene regions. The genes in bold correspond to virulence genes (suggested by literature).

## SUPPLEMENTARY FIGURE LEGENDS

**Fig. S1 Spacer conservation of various serovars of *Salmonella*.** Spacer conservation in **a.** CRISPR1 array and **b.** CRISPR2 array across *Salmonella* serovars. **c & d.** Inter-serovar spacer conservation in both, **c.** the CRISPR1 and **d.** CRISPR2 arrays. The colour code for a particular column represents spacer sequences with greater than 90% nucleotide similarity. The number denotes the position of the spacer from the leader sequence. The direct repeats have been eliminated for simplicity. The asterisk (\*) represents the host-specific serovars. The duplication and triplication is depicted as a pattern in the coloured box. The images were generated using Microsoft Excel 365.

**Fig. S2. The sequence logo of the consensus DR sequence and last direct repeat.** The DR sequence of all the strains belonging to the CRISPR1-STM, CRISPR1-STY and CRISPR2 were considered and the web-logo of these were generated. The last direct repeat (distal to the leader sequence) was observed to contain SNPs. **a.** CRISPR1-STM consensus DR, **b.** CRISPR1-STM last DR, **c.** CRISPR1-STY consensus DR, **d.** CRISPR1-STY last DR, **e.** CRISPR2 consensus DR, and **f.** CRISPR2 last DR. The sequence logos were generated using WEBLOGO ver 2.8.2 available at <https://weblogo.berkeley.edu/>

**Fig. S3. The phylogenetic trees of a. CRISPR1 leader and b. CRISPR2 leader.** The phylogenetic tree were constructed using PHYML version 3.1 with statistical tests for branch support. The values indicate the aLRT scores.

**Fig. S4. The sequence logos of the leader sequence for each CRISPR array.** The leader sequence of all the strains were aligned and a Web-logo was generated. The CRISPR1 leader sequence of *Salmonella enterica* subsp. *enterica* is of two types CRISPR1-STM and CRISPR1-STY. The CRISPR2 leader sequence is present and highly conserved among all the serovars except *Salmonella enterica* subsp. *arizonae* and subsp. *diarizonae*. **a.** CRISPR1-STM *S. enterica* subsp. *enterica*, **b.** CRISPR1 *S. enterica* subsp. *arizonae* and subsp. *diarizonae enterica* **c.** CRISPR1 *Salmonella bongori* **d.** CRISPR1-STY *S. enterica* **e.** CRISPR2 *S. enterica* subsp. *enterica*. **f.** CRISPR2 *Salmonella bongori*. The sequence logos were generated using WEBLOGO ver 2.8.2 available at <https://weblogo.berkeley.edu/>

**Fig. S5. Heat map representing the spacer conservation for a. CRISPR1 array b. CRISPR2 array c. both the CRISPR arrays combined.** The unique set of CRISPR spacers of each serovar was compared with the remaining serovars for their presence. The spacers showing 90% sequence similarity were considered to be same. Based on this the proportion of spacers shared across serovars was analysed and heat map was made. The heat maps were created using the tool Seaborn version 0.11 available at <https://seaborn.pydata.org/><sup>1</sup>.

**Fig. S6. Orientation of the CRISPR array and the *cas* operon in *Salmonella*.** Five types of arrangements were evident in *Salmonella*. The *cas*-STY arrangement present in strains belonging to the CRISPR1-STY clade. The *cas*-STM type operon were subdivided into four types - *S. enterica* subsp. *enterica* (*cas*-STM, belong to CRISPR1-STM clade), *S. bongori* (*cas*-STM.B), *S. enterica* subsp. *enterica*, subsp. *arizonae* (*cas*-STM.A) and subsp. *diarizonae* (*cas*-STM.D). All the strains of serovar Montevideo-STM and *S. enterica* subsp. *diarizonae* str. MZ0080 (used in our study) contain a non-sense mutation in *cas3* and is represented by an asterisk (\*). *Salmonella bongori* str. SA19983605 (used in our study) does not contain the *cas7* gene and is depicted by a hash (#) and all strains of *S. enterica* subsp. *arizonae* contain a stop codon in the *cas3* operon represented by a thunderbolt.

**Fig. S7. The percentage conservation of the entire *cas* operon.** The values in the matrix represent the percentage nucleotide match between the categories. The reference strains used were *S. enterica* serovar Typhimurium str.14028S, Typhi str. CT18, *S. enterica* subsp. *arizonae* str. NCTC10047, *S. enterica* subsp. *diarizonae* str. MZ0080 and *S. bongori* str. SA19983605.

**Fig. S8. The phylogenetic tree of *cas3* gene.** The phylogenetic tree were constructed using PHYML version 3.1 with statistical tests for branch support. The values indicate the aLRT scores.

**Fig. S9. The multiple sequence alignment of Cas3 and Cse1 protein by Clustal Omega. a. Cas3** The domains were predicted using InterPro (<https://www.ebi.ac.uk/interpro/>). The alignment was done using NCBI BLAST. The similarity between the three domains- HD domain, DEAD box and Helicase C-terminal are indicated by yellow, green and blue boxes respectively. **b. Cse1** The bold red color represents fully conserved residues (\*) and strongly similar groups with a score >0.5 in Gonnet PAM 250 matrix (:). The red color represent groups of weekly similar properties with a score <0.5 (.) for the residues essential for PAM recognition. The residues essential for Cas3 protein recruitment is indicated by the red box

**Fig. S10. The phylogeny of CRISPR1 leader.** The CRISPR1 leader sequences of 128 strains were aligned using MUSCLE and the phylogenetic trees was constructed by Maximum Likelihood.

**Fig. S11. Heat map for sharing of protospacer source by pairs of serovars for spacers belonging to a. CRISPR1 array and b. CRISPR2 array.** The protospacer sources - phages, plasmids and DNA viruses were extracted using the tool CRISPR target. The protospacers were matched among all serovars and a map of same targets were created. The heat maps were created using the tool Seaborn version 0.11 available at <https://seaborn.pydata.org/><sup>1</sup>.

**Fig. S12. Graph representing the relationship between the no. of spacers and no. of protospacer for a. CRISPR1 array and b. CRISPR2 array.** The X-axis values is in the increasing number of spacers. Y-axis represent the values of obtained protospacer matches corresponding to all the spacers of the array. The graphs were created using GraphPad Prism 8 available at <https://www.graphpad.com/>

**Fig. S13. Sequence alignment of the region between the transposase and CRISPR1 in *S. enterica* subsp. *enterica* serovar Typhimurium and *Citrobacter freundii* complex sp. CFNIH3.** The region between the transposase and CRISPR1 was extracted from NCBI database. The sequences were then aligned using NCBI nucleotide BLAST. 81.98% identity was obtained for 51% query cover yielding nearly 40% sequence similarity.

Figure S1

a.

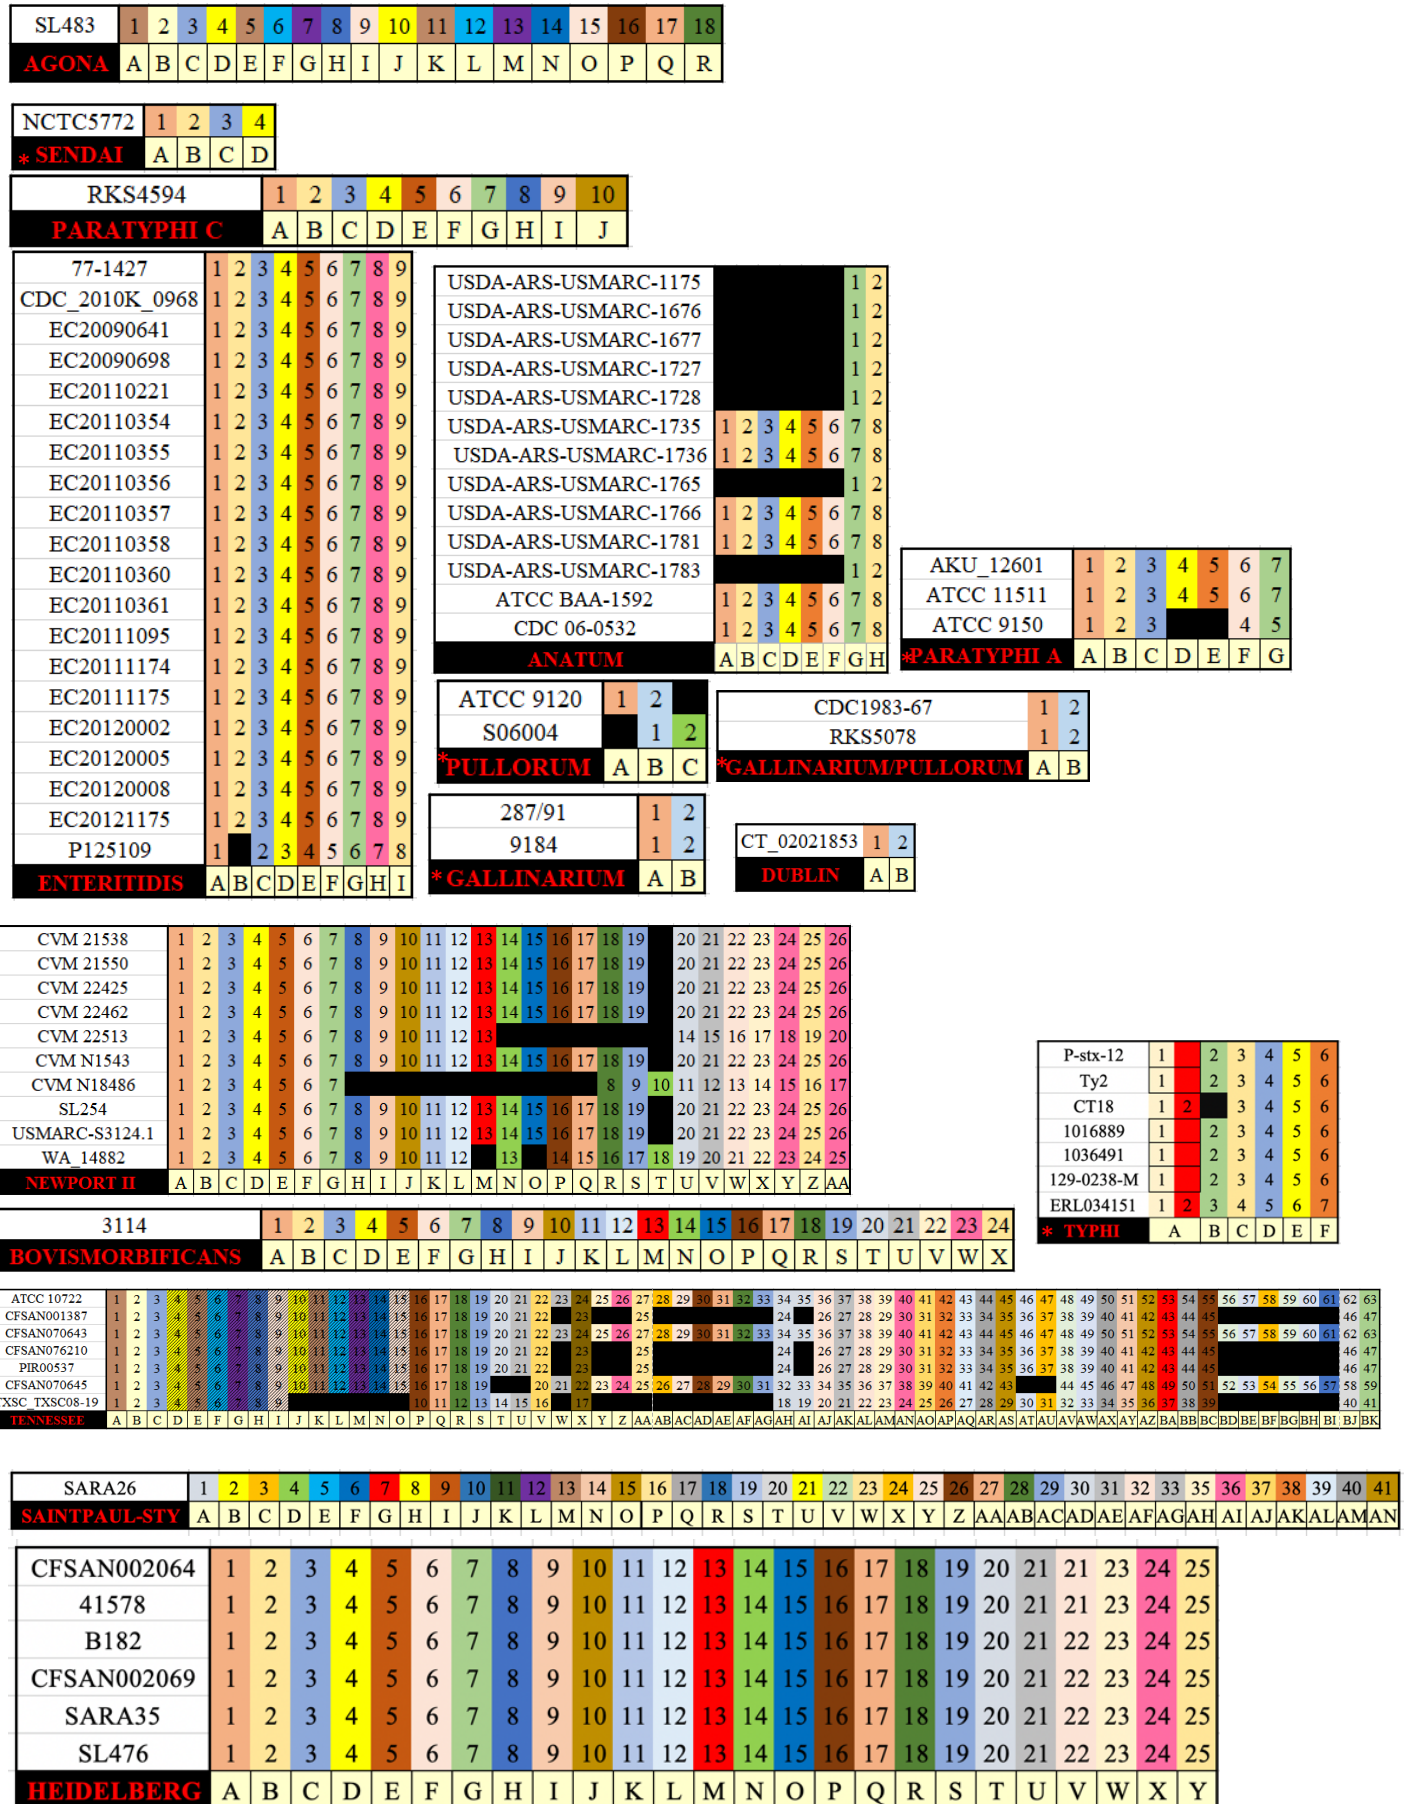



b.

|                      |   |   |   |   |   |   |   |   |   |    |    |    |    |    |    |    |    |    |    |    |    |    |    |    |    |    |
|----------------------|---|---|---|---|---|---|---|---|---|----|----|----|----|----|----|----|----|----|----|----|----|----|----|----|----|----|
| USDA-ARS-USMARC-1175 | 1 | 2 | 3 | 4 | 5 | 6 | 7 | 8 | 9 | 10 | 11 | 12 | 13 | 14 | 15 | 16 | 17 | 18 | 19 | 20 | 21 | 22 | 23 | 24 | 25 | 26 |
| USDA-ARS-USMARC-1676 | 1 | 2 |   |   |   |   |   |   |   | 3  | 4  | 5  | 6  | 7  | 8  | 9  | 10 | 11 | 12 | 13 | 14 | 15 | 16 | 17 | 18 | 19 |
| USDA-ARS-USMARC-1677 |   |   |   | 1 | 2 | 3 | 4 | 5 | 6 | 7  | 8  | 9  | 10 | 11 | 12 | 13 | 14 | 15 | 16 | 17 | 18 | 19 | 20 | 21 |    |    |
| USDA-ARS-USMARC-1727 | 1 | 2 | 3 |   |   |   |   |   |   |    |    |    |    |    |    |    |    | 4  | 5  | 6  | 7  | 8  | 9  | 10 | 11 | 12 |
| USDA-ARS-USMARC-1728 | 1 | 2 | 3 | 4 | 5 | 6 | 7 | 8 | 9 |    | 10 | 11 | 12 | 13 | 14 | 15 | 16 | 17 | 18 | 19 | 20 | 21 | 22 | 23 | 24 | 25 |
| USDA-ARS-USMARC-1735 |   |   |   |   |   |   |   |   |   |    |    |    |    |    |    |    |    | 1  | 2  |    | 3  | 4  | 5  | 6  | 7  | 8  |
| USDA-ARS-USMARC-1736 | 1 | 2 | 3 | 4 | 5 | 6 | 7 | 8 | 9 | 10 | 11 | 12 | 13 | 14 | 15 | 16 | 17 | 18 | 19 | 20 | 21 | 22 | 23 | 24 | 25 | 26 |
| USDA-ARS-USMARC-1765 | 1 | 2 | 3 | 4 | 5 | 6 |   | 7 | 8 | 9  | 10 | 11 |    |    |    |    | 12 | 13 | 14 | 15 | 16 | 17 | 18 | 19 | 20 | 21 |
| USDA-ARS-USMARC-1766 | 1 | 2 | 3 | 4 | 5 | 6 | 7 | 8 | 9 | 10 | 11 | 12 | 13 | 14 | 15 | 16 | 17 | 18 | 19 | 20 | 21 | 22 | 23 | 24 |    |    |
| USDA-ARS-USMARC-1781 | 1 | 2 | 3 | 4 | 5 | 6 | 7 | 8 | 9 | 10 |    |    |    |    |    |    | 11 | 12 | 13 | 14 | 15 | 16 | 17 | 18 | 19 | 20 |
| USDA-ARS-USMARC-1783 | 1 | 2 | 3 | 4 | 5 | 6 | 7 | 8 | 9 |    | 10 | 11 | 12 | 13 | 14 | 15 | 16 | 17 | 18 | 19 | 20 | 21 | 22 | 23 | 24 | 25 |
| ATCC BAA-1592        | 1 | 2 | 3 | 4 | 5 | 6 | 7 | 8 | 9 | 10 |    |    |    |    |    |    | 11 | 12 | 13 | 14 | 15 | 16 | 17 | 18 | 19 | 20 |
| CDC 06-0532          | 1 | 2 | 3 | 4 | 5 | 6 | 7 | 8 | 9 | 10 |    |    |    |    |    |    | 11 | 12 | 13 | 14 | 15 | 16 | 17 | 18 | 19 | 20 |
| <b>ANATUM</b>        | A | B | C | D | E | F | G | H | I | J  | K  | L  | M  | N  | O  | P  | Q  | R  | S  | T  | U  | V  | W  | X  | Y  | Z  |

|                    |   |   |   |   |   |   |   |   |   |    |    |    |  |  |  |  |  |  |  |  |  |  |  |  |  |  |  |
|--------------------|---|---|---|---|---|---|---|---|---|----|----|----|--|--|--|--|--|--|--|--|--|--|--|--|--|--|--|
| 77-1427            | 1 |   |   | 2 | 3 | 4 | 5 | 6 | 7 | 8  |    |    |  |  |  |  |  |  |  |  |  |  |  |  |  |  |  |
| CDC_2010K_0968     | 1 | 2 | 3 | 4 | 5 | 6 | 7 | 8 | 9 | 10 | 11 |    |  |  |  |  |  |  |  |  |  |  |  |  |  |  |  |
| EC20090641         | 1 | 2 | 3 | 4 | 5 | 6 | 7 | 8 | 9 | 10 | 11 |    |  |  |  |  |  |  |  |  |  |  |  |  |  |  |  |
| EC20090698         | 1 | 2 | 3 | 4 | 5 | 6 | 7 | 8 | 9 | 10 | 11 |    |  |  |  |  |  |  |  |  |  |  |  |  |  |  |  |
| EC20110221         | 1 | 2 | 3 | 4 | 5 | 6 | 7 | 8 | 9 | 10 | 11 |    |  |  |  |  |  |  |  |  |  |  |  |  |  |  |  |
| EC20110354         | 1 | 2 | 3 | 4 | 5 | 6 | 7 | 8 | 9 | 10 | 11 | 12 |  |  |  |  |  |  |  |  |  |  |  |  |  |  |  |
| EC20110355         | 1 | 2 | 3 | 4 | 5 | 6 | 7 | 8 | 9 | 10 | 11 | 12 |  |  |  |  |  |  |  |  |  |  |  |  |  |  |  |
| EC20110356         | 1 | 2 | 3 | 4 | 5 | 6 | 7 | 8 | 9 | 10 | 11 | 12 |  |  |  |  |  |  |  |  |  |  |  |  |  |  |  |
| EC20110357         | 1 | 2 | 3 | 4 | 5 | 6 | 7 | 8 | 9 | 10 | 11 | 12 |  |  |  |  |  |  |  |  |  |  |  |  |  |  |  |
| EC20110358         | 1 | 2 | 3 | 4 | 5 | 6 | 7 | 8 | 9 | 10 | 11 | 12 |  |  |  |  |  |  |  |  |  |  |  |  |  |  |  |
| EC20110360         | 1 | 2 | 3 | 4 | 5 | 6 | 7 | 8 | 9 | 10 | 11 | 12 |  |  |  |  |  |  |  |  |  |  |  |  |  |  |  |
| EC20110361         | 1 | 2 | 3 | 4 | 5 | 6 | 7 | 8 | 9 | 10 | 11 | 12 |  |  |  |  |  |  |  |  |  |  |  |  |  |  |  |
| EC20111095         | 1 | 2 | 3 | 4 | 5 | 6 | 7 | 8 | 9 | 10 | 11 | 12 |  |  |  |  |  |  |  |  |  |  |  |  |  |  |  |
| EC20111174         | 1 | 2 | 3 | 4 | 5 | 6 | 7 | 8 | 9 | 10 | 11 | 12 |  |  |  |  |  |  |  |  |  |  |  |  |  |  |  |
| EC20111175         | 1 | 2 | 3 | 4 | 5 | 6 | 7 | 8 | 9 | 10 | 11 | 12 |  |  |  |  |  |  |  |  |  |  |  |  |  |  |  |
| EC20120002         | 1 | 2 | 3 | 4 | 5 | 6 | 7 | 8 | 9 | 10 | 11 | 12 |  |  |  |  |  |  |  |  |  |  |  |  |  |  |  |
| EC20120005         | 1 | 2 | 3 | 4 | 5 | 6 | 7 | 8 | 9 | 10 | 11 | 12 |  |  |  |  |  |  |  |  |  |  |  |  |  |  |  |
| EC20120008         | 1 | 2 | 3 | 4 | 5 | 6 | 7 | 8 | 9 | 10 | 11 | 12 |  |  |  |  |  |  |  |  |  |  |  |  |  |  |  |
| EC20121175         | 1 | 2 | 3 | 4 | 5 | 6 | 7 | 8 | 9 | 10 | 11 | 12 |  |  |  |  |  |  |  |  |  |  |  |  |  |  |  |
| P125109            | 1 | 2 |   | 3 | 4 | 5 | 6 | 7 | 8 | 9  | 10 |    |  |  |  |  |  |  |  |  |  |  |  |  |  |  |  |
| <b>ENTERITIDIS</b> | A | B | C | D | E | F | G | H | I | J  | K  | L  |  |  |  |  |  |  |  |  |  |  |  |  |  |  |  |

|                   |   |   |   |   |   |   |   |   |   |    |    |    |    |    |    |    |    |    |    |  |  |  |  |  |  |  |  |
|-------------------|---|---|---|---|---|---|---|---|---|----|----|----|----|----|----|----|----|----|----|--|--|--|--|--|--|--|--|
| CFSAN002064       | 1 | 2 | 3 | 4 | 5 | 6 | 7 | 8 | 9 | 10 | 11 | 12 | 13 | 14 | 15 | 16 | 17 | 18 |    |  |  |  |  |  |  |  |  |
| 41578             | 1 | 2 | 3 | 4 | 5 |   | 6 | 7 | 8 | 9  | 10 | 11 | 12 | 13 | 14 | 15 | 16 | 17 | 18 |  |  |  |  |  |  |  |  |
| B182              | 1 | 2 | 3 | 4 | 5 | 6 | 7 | 8 | 9 | 10 | 11 | 12 | 13 | 14 | 15 | 16 | 17 | 18 |    |  |  |  |  |  |  |  |  |
| CFSAN002069       | 1 | 2 | 3 | 4 | 5 | 6 | 7 | 8 | 9 | 10 | 11 | 12 | 13 | 14 | 15 | 16 | 17 | 18 |    |  |  |  |  |  |  |  |  |
| SARA35            | 1 | 2 | 3 | 4 | 5 | 6 | 7 | 8 | 9 | 10 | 11 | 12 | 13 | 14 | 15 | 16 | 17 | 18 |    |  |  |  |  |  |  |  |  |
| SL476             | 1 | 2 | 3 | 4 | 5 | 6 | 7 | 8 | 9 | 10 | 11 | 12 | 13 | 14 | 15 | 16 | 17 | 18 |    |  |  |  |  |  |  |  |  |
| <b>HEIDELBERG</b> | A | B | C | D | E | F | G | H | I | J  | K  | L  | M  | N  | O  | P  | Q  | R  |    |  |  |  |  |  |  |  |  |

|                   |   |   |   |   |   |   |   |   |   |    |    |    |    |    |    |    |    |    |    |    |    |    |    |    |  |  |  |
|-------------------|---|---|---|---|---|---|---|---|---|----|----|----|----|----|----|----|----|----|----|----|----|----|----|----|--|--|--|
| CVM 21538         | 1 | 2 | 3 | 4 | 5 | 6 | 7 | 8 | 9 | 10 | 11 | 12 | 13 | 14 |    | 15 | 16 | 17 | 18 | 19 |    |    |    |    |  |  |  |
| CVM 21550         | 1 | 2 | 3 | 4 | 5 | 6 | 7 | 8 | 9 | 10 | 11 | 12 | 13 | 14 |    | 15 | 16 | 17 | 18 | 19 |    |    |    |    |  |  |  |
| CVM 22425         | 1 | 2 | 3 | 4 | 5 | 6 | 7 | 8 | 9 | 10 | 11 | 12 | 13 | 14 |    | 15 | 16 | 17 | 18 | 19 |    |    |    |    |  |  |  |
| CVM 22462         | 1 | 2 | 3 | 4 | 5 | 6 | 7 | 8 | 9 | 10 | 11 | 12 | 13 | 14 |    | 15 | 16 | 17 | 18 | 19 |    |    |    |    |  |  |  |
| CVM 22513         | 1 | 2 | 3 | 4 | 5 | 6 | 7 | 8 | 9 | 10 | 11 | 12 | 13 | 14 |    | 15 | 16 | 17 | 18 | 19 |    |    |    |    |  |  |  |
| CVM N1543         | 1 | 2 | 3 | 4 | 5 | 6 | 7 | 8 | 9 | 10 | 11 | 12 | 13 | 14 |    | 15 | 16 | 17 | 18 | 19 |    |    |    |    |  |  |  |
| CVM N18486        | 1 | 2 | 3 | 4 | 5 | 6 | 7 | 8 |   |    |    |    |    |    |    |    |    |    |    |    | 9  | 10 | 11 | 12 |  |  |  |
| SL254             | 1 | 2 | 3 | 4 | 5 | 6 | 7 | 8 | 9 | 10 | 11 | 12 | 13 | 14 |    | 15 | 16 | 17 | 18 | 19 |    |    |    |    |  |  |  |
| USMARC-S3124.1    | 1 | 2 | 3 | 4 | 5 | 6 | 7 | 8 | 9 | 10 | 11 | 12 | 13 | 14 |    | 15 | 16 | 17 | 18 | 19 |    |    |    |    |  |  |  |
| WA_14882          | 1 | 2 | 3 | 4 | 5 | 6 | 7 | 8 |   |    | 9  | 10 | 11 | 12 | 13 | 14 | 15 | 16 | 17 | 18 | 19 |    |    |    |  |  |  |
| <b>NEWPORT II</b> | A | B | C | D | E | F | G | H | I | J  | K  | L  | M  | N  | O  | P  | Q  | R  | S  | T  | U  |    |    |    |  |  |  |

|                     |   |   |   |   |   |   |   |   |   |    |  |  |  |  |  |  |  |  |  |  |  |  |  |  |  |  |  |
|---------------------|---|---|---|---|---|---|---|---|---|----|--|--|--|--|--|--|--|--|--|--|--|--|--|--|--|--|--|
| NCTC5772            | 1 |   |   |   |   |   |   |   |   |    |  |  |  |  |  |  |  |  |  |  |  |  |  |  |  |  |  |
| <b>*SENDAI</b>      | A |   |   |   |   |   |   |   |   |    |  |  |  |  |  |  |  |  |  |  |  |  |  |  |  |  |  |
| 287/91              | 1 | 2 | 3 | 4 | 5 | 6 | 7 | 8 | 9 | 10 |  |  |  |  |  |  |  |  |  |  |  |  |  |  |  |  |  |
| 9184                | 1 | 2 | 3 | 4 | 5 | 6 | 7 | 8 | 9 | 10 |  |  |  |  |  |  |  |  |  |  |  |  |  |  |  |  |  |
| <b>*GALLINARIUM</b> | A | B | C | D | E | F | G | H | I | J  |  |  |  |  |  |  |  |  |  |  |  |  |  |  |  |  |  |

|                  |   |   |   |   |   |   |  |  |  |  |  |  |  |  |  |  |  |  |  |  |  |  |  |  |  |  |  |
|------------------|---|---|---|---|---|---|--|--|--|--|--|--|--|--|--|--|--|--|--|--|--|--|--|--|--|--|--|
| ATCC 9120        | 1 | 2 | 3 | 4 | 5 | 6 |  |  |  |  |  |  |  |  |  |  |  |  |  |  |  |  |  |  |  |  |  |
| S06004           | 1 |   |   |   |   | 2 |  |  |  |  |  |  |  |  |  |  |  |  |  |  |  |  |  |  |  |  |  |
| <b>*PULLORUM</b> | A | B | C | D | E | F |  |  |  |  |  |  |  |  |  |  |  |  |  |  |  |  |  |  |  |  |  |

|               |   |   |   |   |   |  |  |  |  |  |  |  |  |  |  |  |  |  |  |  |  |  |  |  |  |  |  |
|---------------|---|---|---|---|---|--|--|--|--|--|--|--|--|--|--|--|--|--|--|--|--|--|--|--|--|--|--|
| CT_02021853   | 1 | 2 | 3 | 4 | 5 |  |  |  |  |  |  |  |  |  |  |  |  |  |  |  |  |  |  |  |  |  |  |
| <b>DUBLIN</b> | A | B | C | D | E |  |  |  |  |  |  |  |  |  |  |  |  |  |  |  |  |  |  |  |  |  |  |

|                               |   |   |   |   |   |   |  |  |  |  |  |  |  |  |  |  |  |  |  |  |  |  |  |  |  |  |  |
|-------------------------------|---|---|---|---|---|---|--|--|--|--|--|--|--|--|--|--|--|--|--|--|--|--|--|--|--|--|--|
| CDC1983-67                    | 1 | 2 | 3 | 4 | 5 | 6 |  |  |  |  |  |  |  |  |  |  |  |  |  |  |  |  |  |  |  |  |  |
| RKS5078                       | 1 | 2 | 3 | 4 | 5 | 6 |  |  |  |  |  |  |  |  |  |  |  |  |  |  |  |  |  |  |  |  |  |
| <b>* GALLINARIUM/PULLORUM</b> | A | B | C | D | E | F |  |  |  |  |  |  |  |  |  |  |  |  |  |  |  |  |  |  |  |  |  |

|                      |   |   |   |  |  |  |  |  |  |  |  |  |  |  |  |  |  |  |  |  |  |  |  |  |  |  |  |
|----------------------|---|---|---|--|--|--|--|--|--|--|--|--|--|--|--|--|--|--|--|--|--|--|--|--|--|--|--|
| AKU_12601            | 1 | 2 | 3 |  |  |  |  |  |  |  |  |  |  |  |  |  |  |  |  |  |  |  |  |  |  |  |  |
| ATCC 11511           | 1 | 2 | 3 |  |  |  |  |  |  |  |  |  |  |  |  |  |  |  |  |  |  |  |  |  |  |  |  |
| ATCC 9150            | 1 | 2 | 3 |  |  |  |  |  |  |  |  |  |  |  |  |  |  |  |  |  |  |  |  |  |  |  |  |
| <b>* PARATYPHI A</b> | A | B | C |  |  |  |  |  |  |  |  |  |  |  |  |  |  |  |  |  |  |  |  |  |  |  |  |

|                      |   |   |   |   |   |   |   |   |   |    |    |    |    |    |    |    |    |    |    |    |    |    |  |  |  |  |  |  |
|----------------------|---|---|---|---|---|---|---|---|---|----|----|----|----|----|----|----|----|----|----|----|----|----|--|--|--|--|--|--|
| CFSAN004173          | 1 | 2 | 3 | 4 | 5 | 6 | 7 | 8 | 9 | 10 |    | 11 | 12 | 13 | 14 | 15 | 16 | 17 | 18 | 19 | 20 |    |  |  |  |  |  |  |
| CFSAN004174          | 1 | 2 | 3 | 4 | 5 | 6 | 7 | 8 | 9 | 10 |    | 11 | 12 | 13 | 14 | 15 | 16 | 17 | 18 | 19 | 20 |    |  |  |  |  |  |  |
| CFSAN004175          | 1 | 2 | 3 | 4 | 5 | 6 | 7 | 8 | 9 | 10 |    | 11 | 12 | 13 | 14 | 15 | 16 | 17 | 18 | 19 | 20 |    |  |  |  |  |  |  |
| SGB23                | 1 | 2 | 3 | 4 | 5 | 6 | 7 | 8 | 9 | 10 | 11 | 12 | 13 | 14 | 15 | 16 | 17 | 18 | 19 | 20 | 21 | 22 |  |  |  |  |  |  |
| <b>SAINTPAUL-STM</b> | A | B | C | D | E | F | G | H | I | J  | K  | L  | M  | N  | O  | P  | Q  | R  | S  | T  | U  | V  |  |  |  |  |  |  |

|        |   |   |   |   |   |   |   |   |   |    |    |    |    |    |
|--------|---|---|---|---|---|---|---|---|---|----|----|----|----|----|
| SARA26 | 1 | 2 | 3 | 4 | 5 | 6 | 7 | 8 | 9 | 10 | 11 | 12 | 13 | 14 |
|--------|---|---|---|---|---|---|---|---|---|----|----|----|----|----|







Figure S3

a.

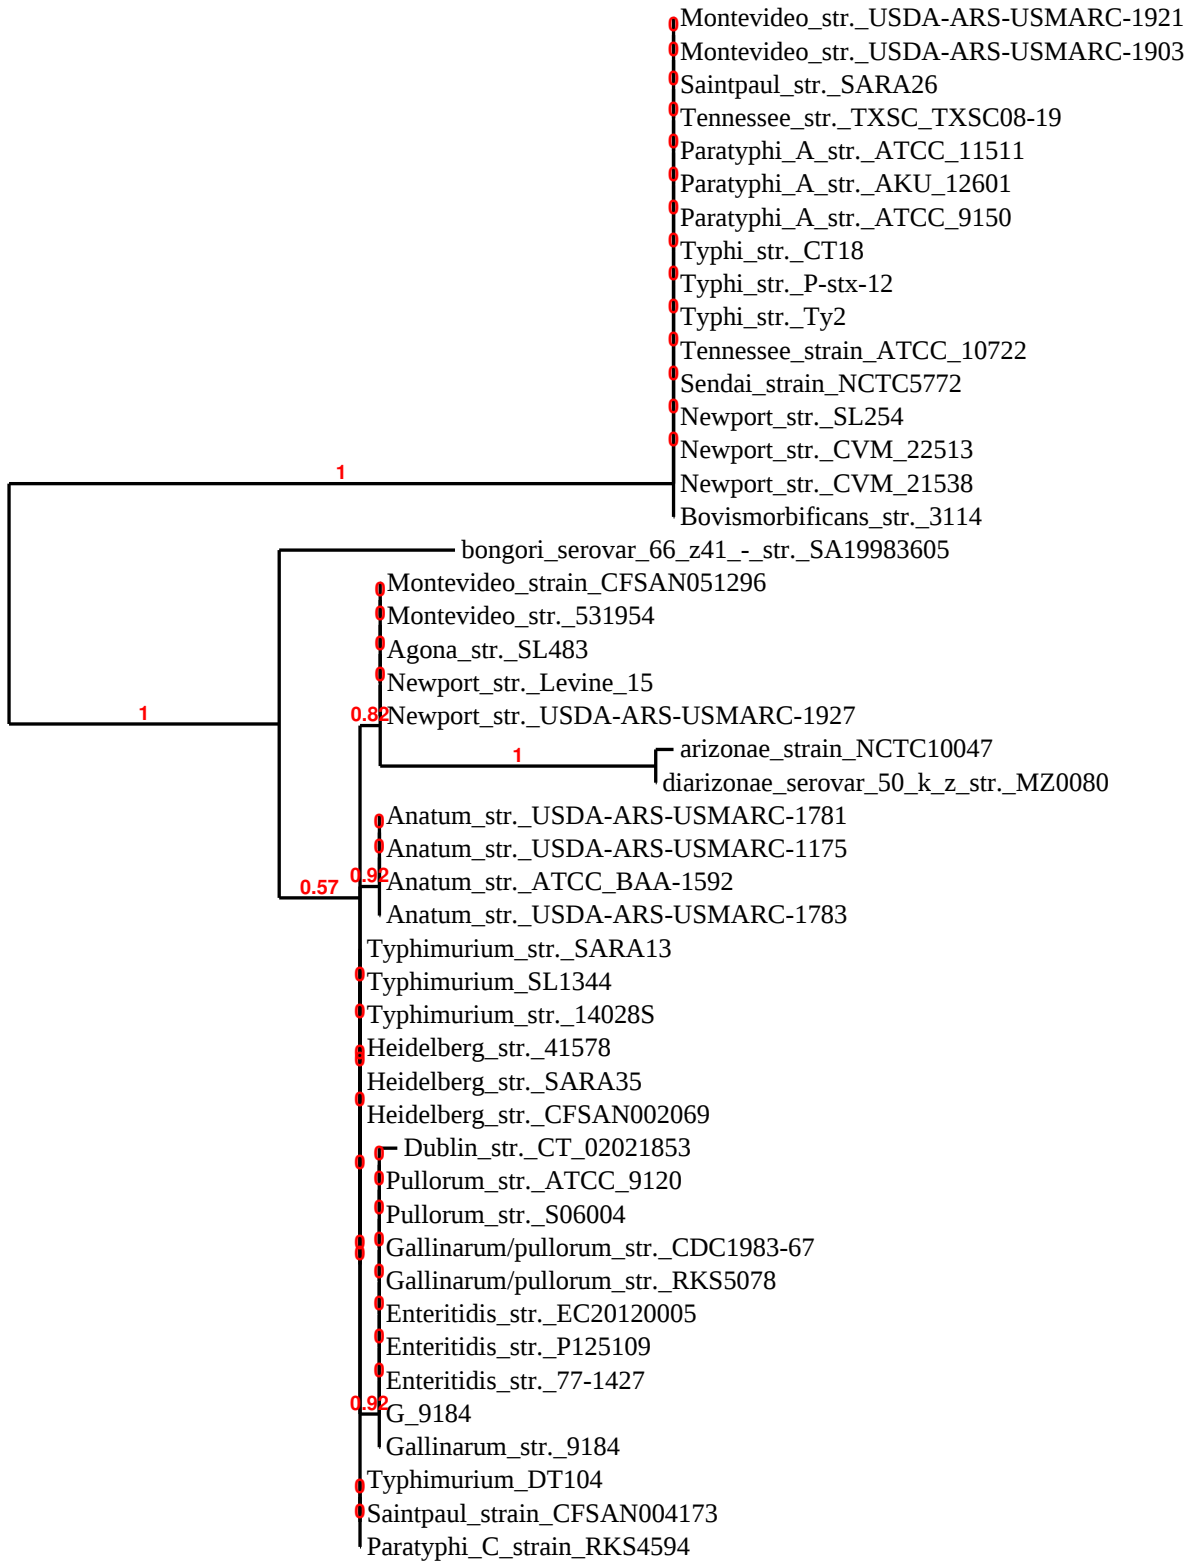

b.

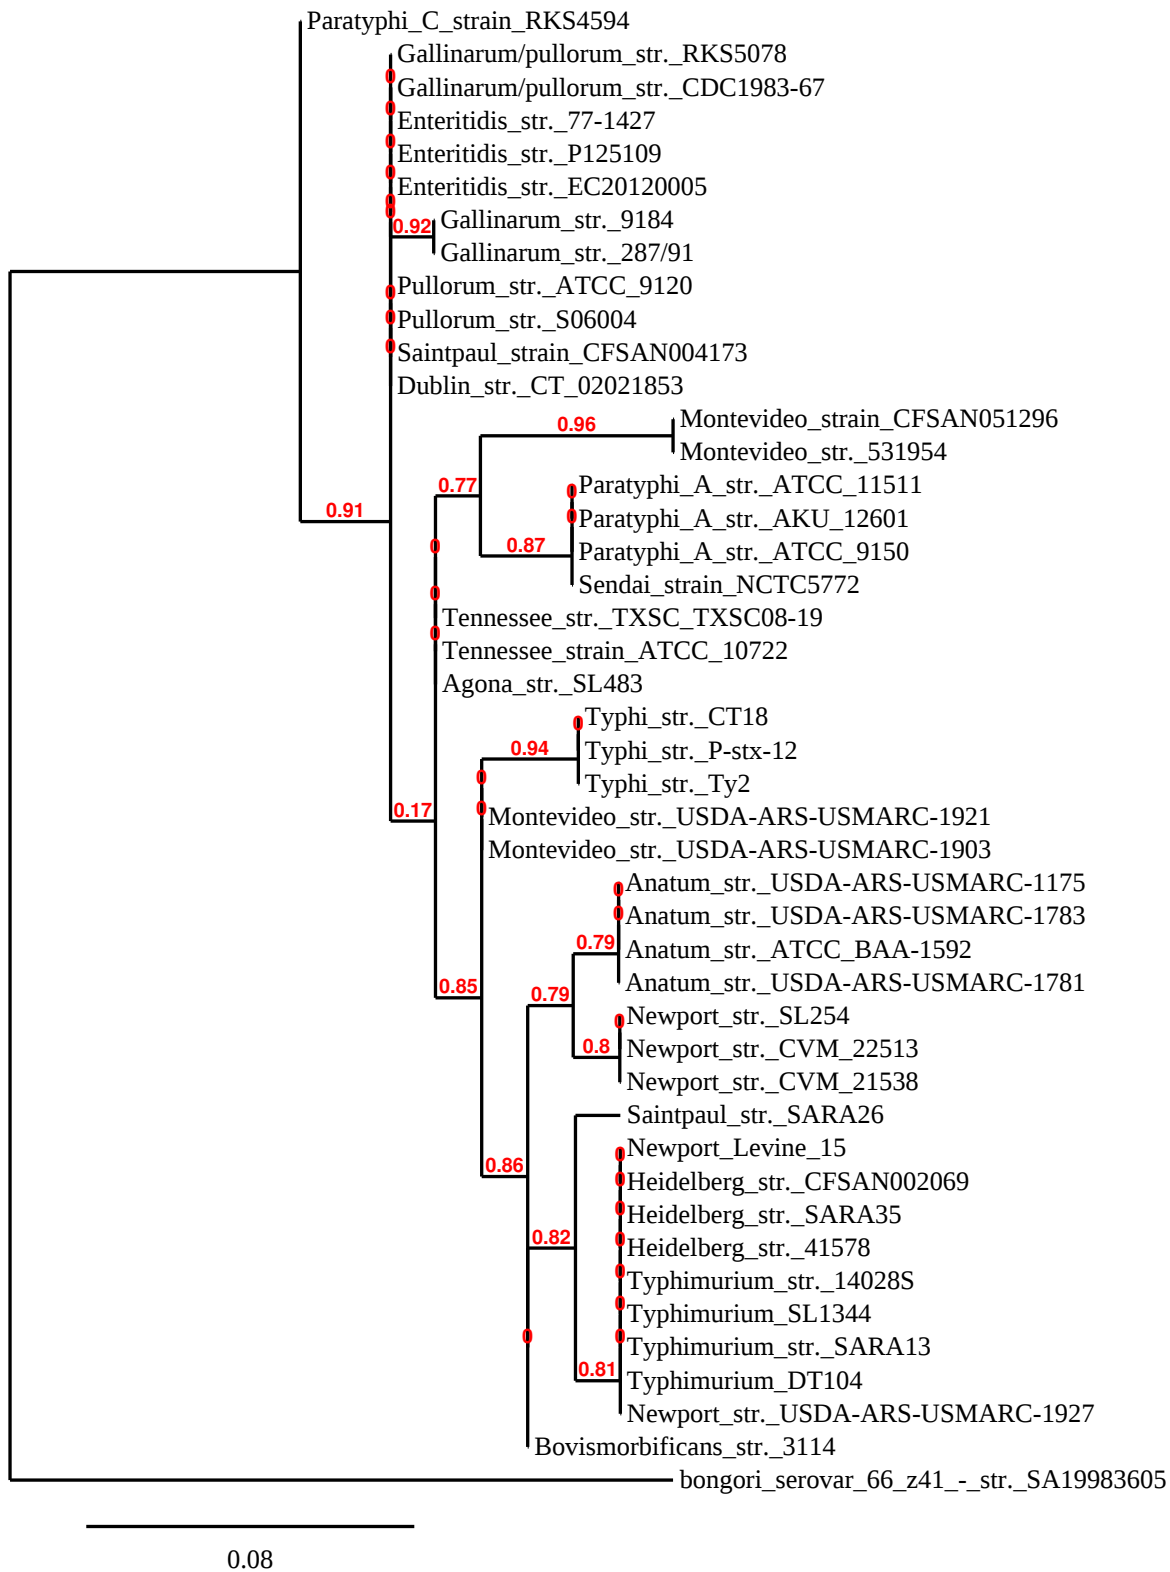

Figure S4

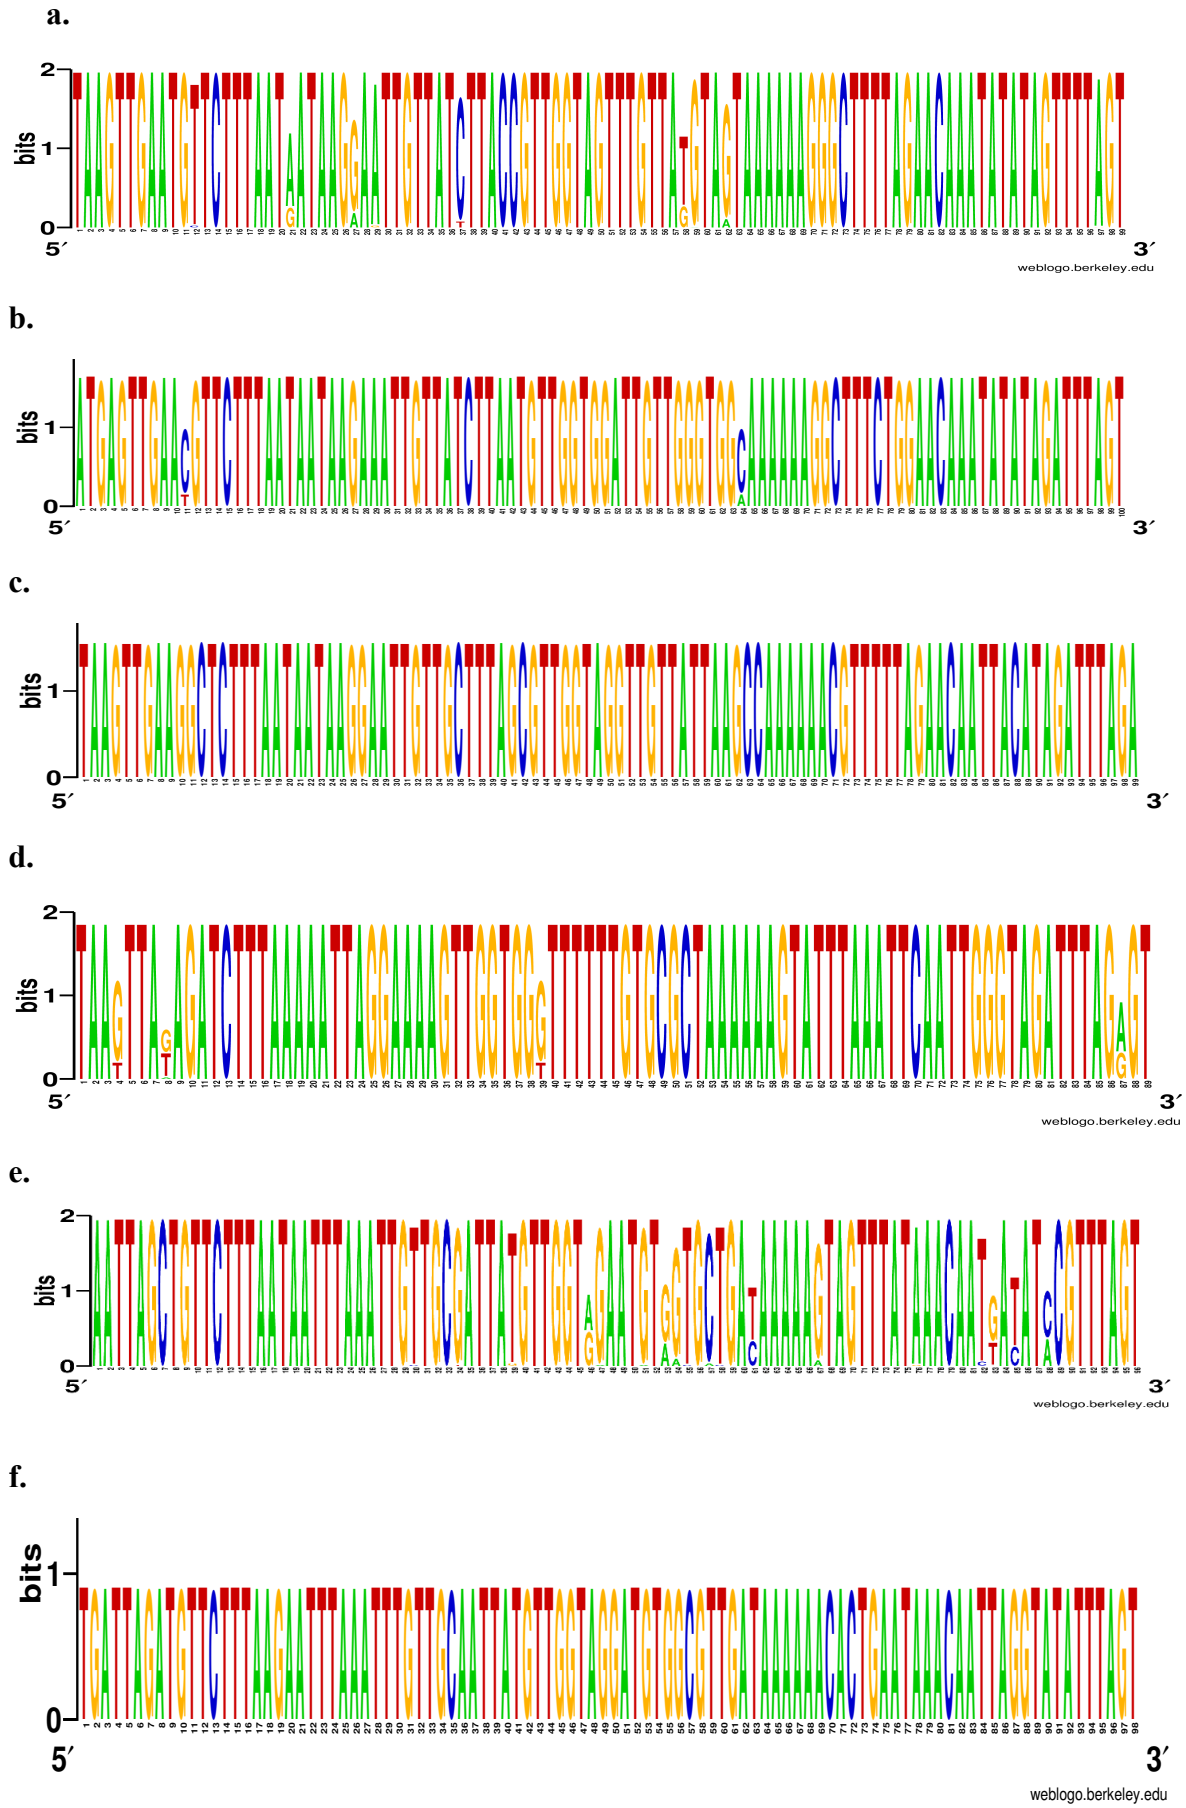



C.

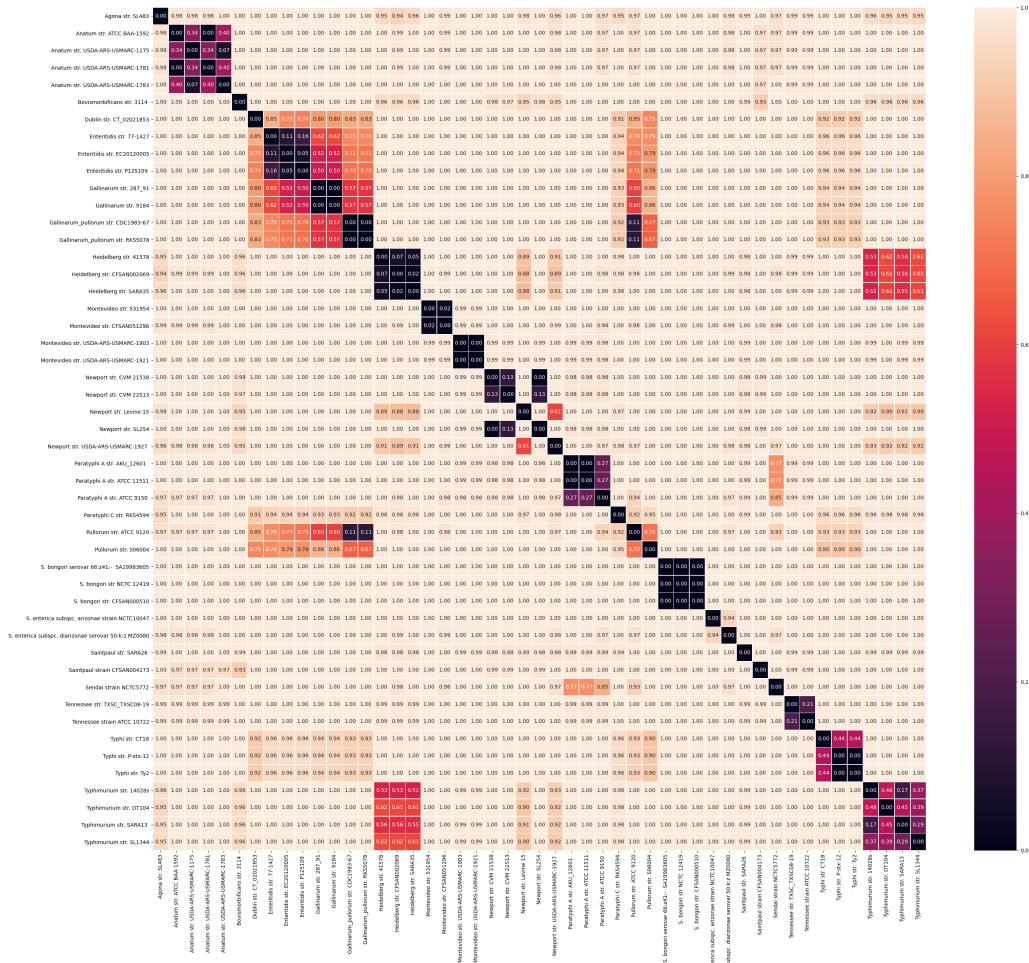

Figure S6

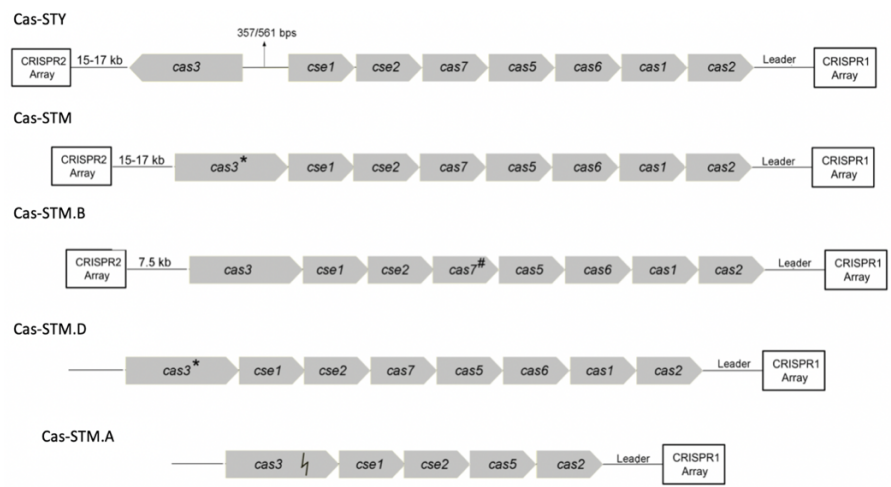

Figure S7

|           | Cas-STM | Cas-STY | Cas-STM.A | Cas-STM.D | Cas-STM.B |
|-----------|---------|---------|-----------|-----------|-----------|
| Cas-STM   |         | 28.6    | 87        | 87        | 85        |
| Cas-STY   |         |         | 23.5      | 24        | 29        |
| Cas-STM.A |         |         |           | 99        | 88        |
| Cas-STM.D |         |         |           |           | 88.2      |
| Cas-STM.B |         |         |           |           |           |

Figure S8

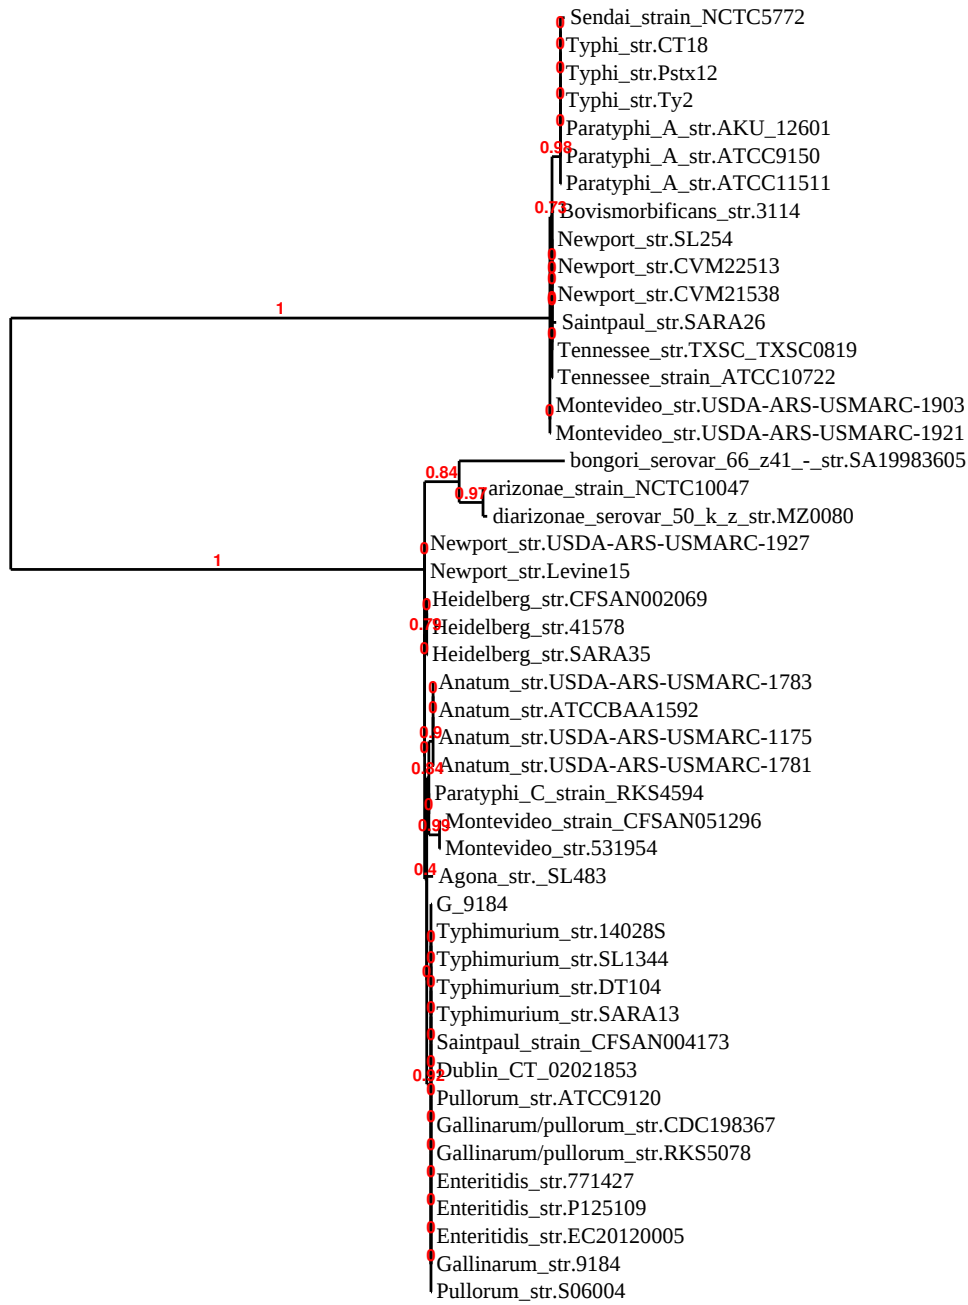

0.3

Figure S9

a.

**HD Domain - 48%**

YWGKSRGETDGGD **DYHLLCWHSLDVA**AVGYWMVINNIYFIDHYLKKLGIQDKEQAAQFF Typhimurium  
YWGK+ + + +YHLL +H LDVAA G +++ NN + + LK+ I A +  
YWGKTDKSTENITC **NYHLLAYHCLDVA**ACGEYIIKNNTFNSCNILKECNISGT-NAENWI Typhi

**AWILCWHDIGKFAHSFQQLYRHEALNIFNEPTRHYEKIAHTTLGYMLWN----**SWLSECP Typhimurium  
W L HDIGKFA FQ+ + + + H +LG+ LW +W S  
**IWFLASHDIGKFARGFQKYAEFPD**SPLVSPISGVSAFERHDSLGFYLVGKLF~~EA~~WSSGSN Typhi

ELFPSSLSVR-KSKRVMALWMPVTTGHHGRPPE **AIQELDHFRQ**QDKD--AARDFLLRIK Typhimurium  
E+ R + + + WM ++TGHHG PP+ ++ D+D AA +L +  
EIIAGIEPENRARFESALNSWMLISTGHHGIPPD **TMKNRSSLAFT**DEDIVAATHYLEALS Typhi

ALFPLITLPEAWDEDEGIDQFQQLSWFISA **AVVLADWTGSASRYF**PRTAEKMPVDTYWQQ Typhimurium  
LFP TLP+ W G +Q SWF + V LADW GS FP + MP+ YW  
ELFPF-TLPQEWKTKAGRKCLKQHSWFFAGL **VTLADW**MGSD~~ESQ~~FPLLSSAMPLKDYWPL Typhi

**DEAD Box - 77%**

ALAKAQTAITLFP~~SAANVSAFTGIETLFPFIQHP~~ **TPLQOKALELDINVDGAQL**FILEDVT Typhimurium  
A KAQ AI P + S + LFPFIQ **TPLQO**+A ELDI+ GAQL +LEDVT  
ACEKAQQAILRMPPLSQHSHYQDHRALFPFIQ **TPLQQRASELDISAPGAQL**VVLEDVT Typhi

GAGKTEAALILAHRLMAAGKAQGLYFGLPTMATANAMFERMANTWLALYQPDSRPSLILA Typhimurium  
GAGKTEAALIL HRLM+A K GLY GLPTMATANAM++R+A+ + AL+ +SRPSLILA  
GAGKTEAALILTHRLMSANKGHGLYVGLPTMATANAMYQRLASAYHALFTDES~~SRPSLILA~~ Typhi

HSARRLMDRFNQS IWSVTL~~SGTEE--PDEAQPYSQ~~CAAWFADSNKKALLAEVGVGTL~~DQ~~ Typhimurium  
H R + D F QSIW T + E+ D+ ++ C WFADS KKALLAEVGVGTL~~DQ~~  
HGGREMSDSFRQSIWQPTENIAEDYARDDGNATTE-CHTW~~FADSRK~~KALLAEVGVGTL~~DQ~~ Typhi

AMMAVMPFKHNNLRL~~LGLSNKILLADEIHACDAWMSRILEGLIERQASNGNATILLSATL~~ Typhimurium  
+MAVMPF+H +LRLLG+ +KILL DE+HA D +M ++LEGL+ A+ G + I+LSATL  
LLMAVMPFRHQSLRL~~LGM~~RDKILL~~LDEVHAYDGYMVKLLEGLLRFHAAQGGSAI~~ILSATL Typhi

SQQORDKLVA~~AFSRGVR~~SVQAPLLGHDD--YPWLTQVTQTELISQ~~RVDTRKEVERCVDI~~ Typhimurium  
R+KL+ AFS G G D+ YPWL+ +T + L+ Q + TR EV+R V +  
PAALREKLLNAFSDGAEFMSAG---GSDNAGYPWLSHLTSSGLLEQPLATRPEVQRTVAV Typhi

**Helicase C-terminal - 81%**

GWLHSEEACLERIGEAVEKEGNCIA **WIRNSVDDAIRIYRQLQ**LSKVVVTENLLLFHSRFAF Typhimurium  
W+ + L+ I V G CI WIRN+VDDA+ Y+QL +V ++LLLFHSRFAF  
NWIQQRQEALDIIYRVVATGQCIC **WIRNTVDDALD**TYQQLLHEGIVPEQDLLLFHSRFAF Typhi

YDRQRIESQTLNLF~~GKQSG-AQRAGKVI~~IATQVIEQSLDIDCEMISDLAPVDLLIQ~~RAG~~ Typhimurium  
DR IE++TLN FG + ++R GKV+IATQV+EQSLD+D D MI+DLAP+DLLIQ~~RAG~~  
IDRIA IENKTLNWFGNAPVSERRGKVL IATQVVEQSLDLD~~DFDWMITDLAPIDLLIQ~~RAG Typhi

RLQRH **IRDRNGLVKKSGQDERETPVL**RILAPEWDDAPR Typhimurium  
RLQRH **IRD +G K + DER+ PVL I P A R**  
RLQRH **IRDAHGQRKSTLPDERQPPVL**HISGPSLAGR Typhi

b.

|             |                                                              |     |
|-------------|--------------------------------------------------------------|-----|
| E.coli      | ---MNLIDNWIPVRPRNGGKQVINLQSLYCSRQWRLSLPRDDMELALALLVCIGQI     | 57  |
| Typhimurium | MDNFSLLTTPWLPVRFKDGSTGKLAPVDLA--DENVVDAATRADLQGAAWQFLGLLQC   | 58  |
| Typhi       | ---MDLTKEKWLPIVFSNGDKKKISLRDLL--DNRIQDLAYPRADFQGAAWQLIGILQC  | 55  |
|             | :.* ** :*. : : .. : : * **: ** :* : *                        |     |
| E.coli      | IAPAKDDVEFRHRIMNPLTEDEFQQLIAPWIDMFYLNHAEHPFMQTKGVKANDVTPMEKL | 117 |
| Typhimurium | SIAPKRYKNWEDIWFDGLHADVLHKALAPLEHAFQFGAETPSFMQDFEPLSSEKVSIASL | 118 |
| Typhi       | TVAPEDKEEWADIWHESIIEFEQWEKALNTISLALQFGEQKPSFLQSFDPDSEYGSIAGL | 115 |
|             | : :. : : : : : : : * : * : : *                               |     |
| E.coli      | LAGVSGATNCA---FVNQPQGEALCGGCTAIALFNQANQAPGFGGFKSGLRGGTPVT    | 173 |
| Typhimurium | LPEIPGAQTTFKNDHFVKRGVTERFCPHCAALALFSLQLNAPAGGKGYRTGLRGGGPLT  | 178 |
| Typhi       | LVDAPGGNALKLNKDFVKRGNVEQICPHCAAIALFAIQTNSPAGGAGYRVGMRGGGPLT  | 175 |
|             | * * . . : * * : * * : * * : * * : * * : * *                  |     |
| E.coli      | TFVRGIDLRS-----TVLLNVLTPRLQKQFPNESHTENQPTWIKPIKSNEIPA--      | 223 |
| Typhimurium | TLVELQEYQGERQTPWRKLNWVMPQDTADLPLPQC-DATVFPWLAATRTEQANAVT     | 237 |
| Typhi       | TLVVPQ---EEDKYLWKKLWLVLPQEEPP---NVTQ-HPLIFPWLAPTCTSEKAGNVV   | 228 |
|             | * : * : : : : : * : : : *                                    |     |
| E.coli      | --SSIGFVRGLFWQPAHIELC-DPIGIGKSCCGQESNLRYTGFLKEKFTFTVNGLWPHP  | 280 |
| Typhimurium | TPEQVNLQAYWGMRRIRLDFATLQSGCCDICGAESDELL-GFMTVKNYGVNYDGRWHP   | 296 |
| Typhi       | TPDNAHPLQAYWGMRRRIELDFHTVAGICDLGEGHESLL-LQMRSKNYGVQYDSWLHP   | 287 |
|             | . . : : : * : * . * * . * : : * : . . * * *                  |     |
| E.coli      | HSPCLVTVKRGEVEEKFLAFTTS--AP---SWTQISRVVVDKIIQENGNRVAAVVNQFR  | 335 |
| Typhimurium | LTPYRAPVKDQN---AFFSVKPPGGLIWRDWLGLSQNNQTEAN---YESPAQVVKVFN   | 349 |
| Typhi       | FSPYRQALKDFSA--PWLAFKQPGGLSYKDWLGLMLNREDKFN---KMQPAKVVAAG    | 341 |
|             | : * : * . : : : . . . * : : : * * *                          |     |
| E.coli      | NIAPQSLELIMG--GY--RNQAS---ILERRHDVLMFNQGWQYGNVINEIVTVGLGY    | 388 |
| Typhimurium | AR---SLTDVKAGIWFADGDFDNMKIRCWEHHPFLMTE---GLIPDLRKAVQTAARL    | 402 |
| Typhi       | QR-----NKMSLWCFAWDMNKAIVRCWYQHRIPLISVSHE-EQFLAALNIVLVLASES   | 393 |
|             | . : : : : : : : : : . : : .                                  |     |
| E.coli      | ----KTALRKALYFAEGFKNKDFKAGVSVHETAERHFYRQSELLIPDVLANVNFSDAD   | 444 |
| Typhimurium | LSLLRSALKEAWFADAKGAR-GDFSFDIDFWNLTQGRFLNLIHDLE-----NGHKPD    | 454 |
| Typhi       | LSLLRNALKSAKFDCKPEAK-MDFSMVDIAFWQETEPAFRTLQEALAVDPLR--QDTQTR | 450 |
|             | : * : * : : : * . : : : * . * : : :                          |     |
| E.coli      | EVIADLRDKLHQLCEMLFNQSVAPYAHHPKLI-STLALARATLYKHL-RELK-----P   | 495 |
| Typhimurium | ERLNKQRELWLFTRHYFDDHVFTNPYESSDLE-RIMTARKKYFTTSAEKQSAAKAKK    | 513 |
| Typhi       | HAVSQWEAELAHYLFHVDRDALTNPCPDILQRLTARQDLAS-SYRKHKARKDVLAL     | 509 |
|             | . . . : * * : . . : ** . . .                                 |     |
| E.coli      | QGGPSNG                                                      | 502 |
| Typhimurium | QEAAE--                                                      | 518 |
| Typhi       | VE----                                                       | 511 |



Figure S10

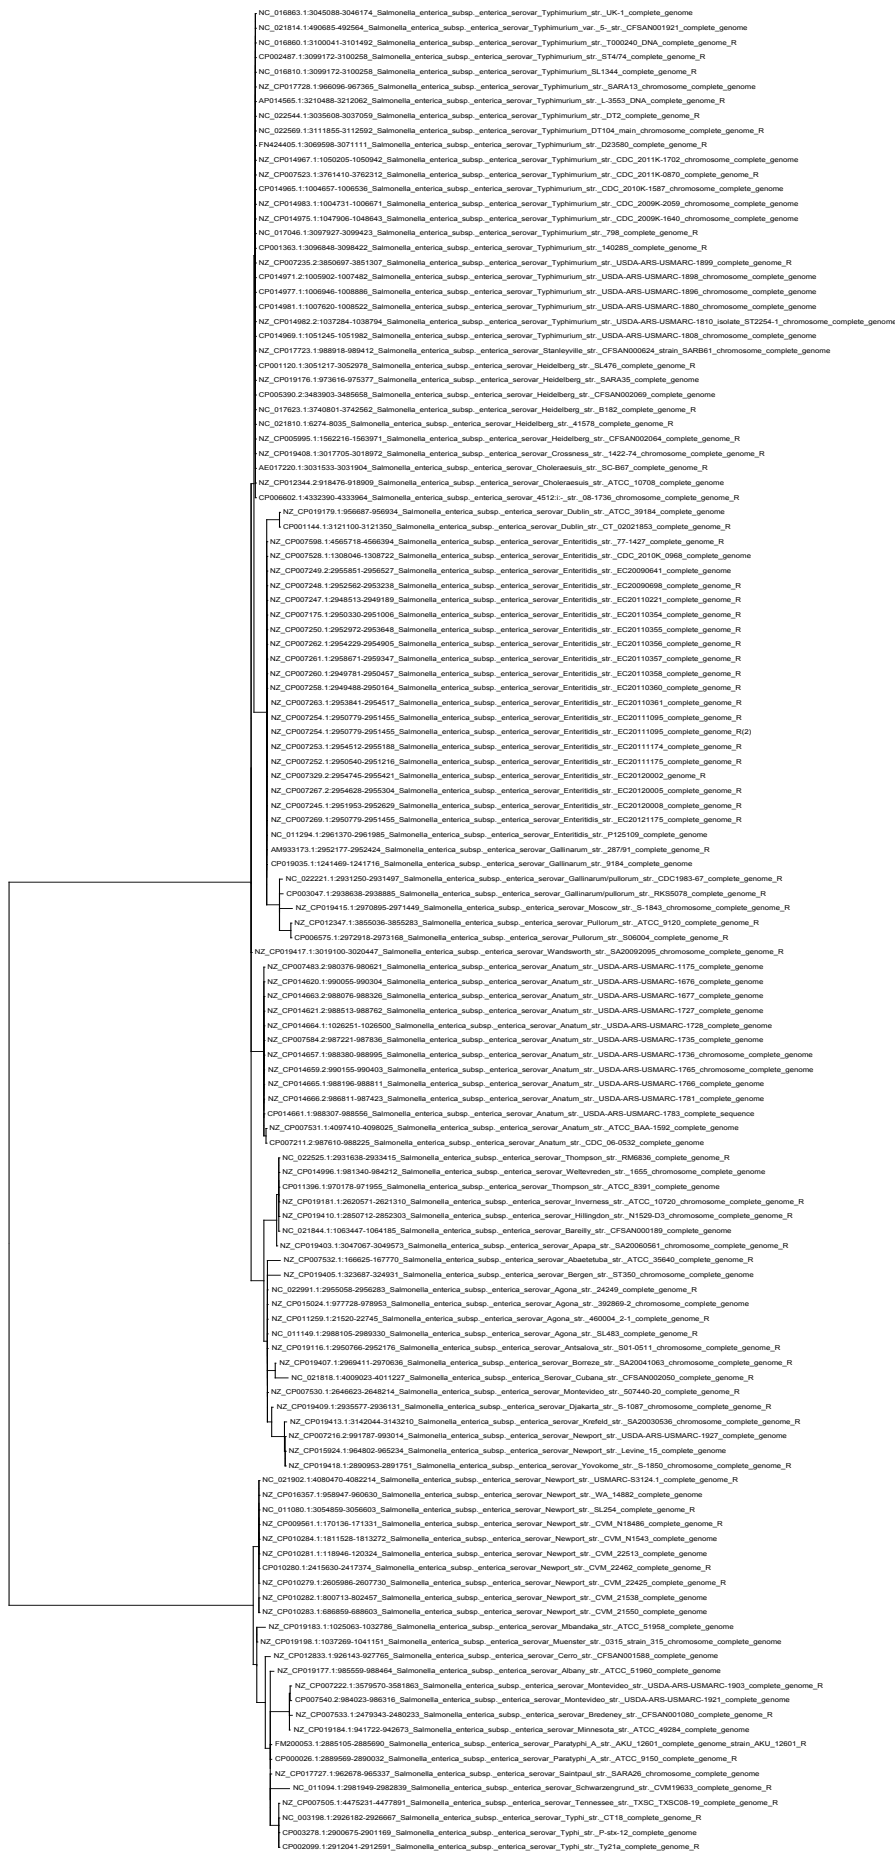



Figure S12

a.

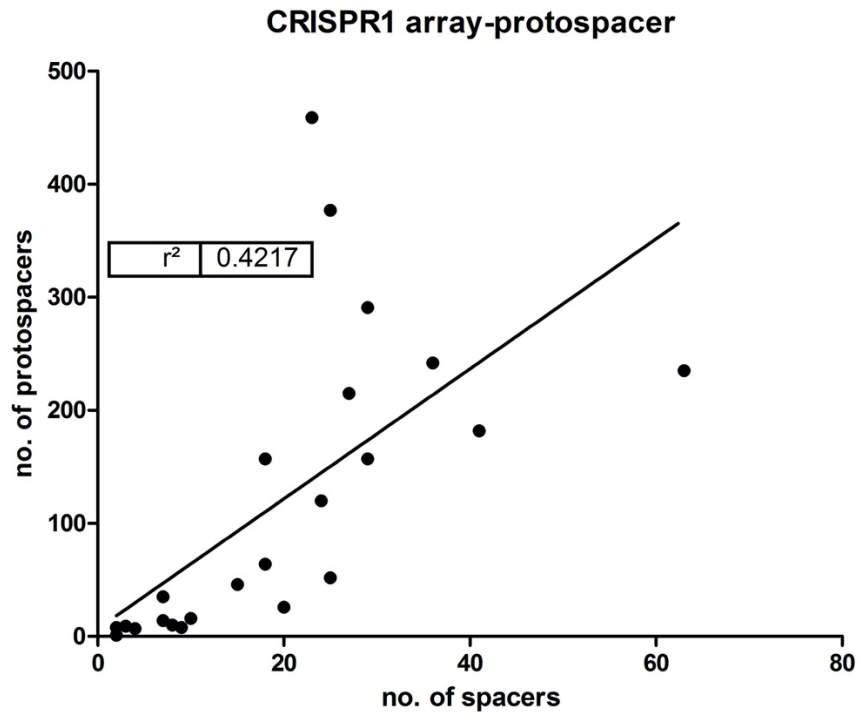

b.

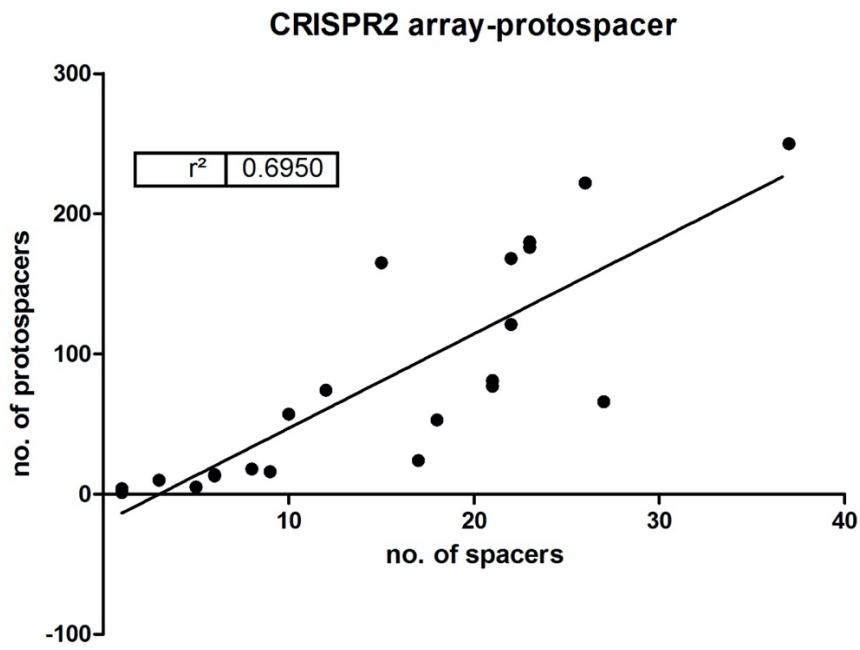



## Supplementary Methodology

### ***CRISPR loci data collection in correct orientation:***

Our study comprises 133 strains belonging to two species, *S. bongori*, and *S. enterica*, including 22 serovars and three subspecies (supplementary table S1). These samples were primitively isolated from multiple sources, including primates, poultry, swine, cattle, food specimens, and natural environment (GenBank database). The complete genome sequences for all these annotated strains were obtained from the GenBank database. Only experimentally validated sequences were considered to ensure the legitimacy of the data being used. The CRISPR loci were identified in two steps - the annotation and orientation of the CRISPR array were retrieved from the online database of CRISPR-Cas<sup>++</sup><sup>19</sup>. The upstream and downstream regions of these arrays were aligned with the leader sequences previously reported by<sup>19</sup> to know the correct sequence of the CRISPR array. The arrays were then classified as CRISPR1 and CRISPR2 after verifying the leader sequence and its position with respect to the *cas* operon<sup>20</sup>.

Most strains of *S. enterica* subsp. *enterica* had both, the CRISPR1 and CRISPR2 arrays. However, all the analyzed strains of *S. enterica* subsp. *enterica* serovar Heidelberg, a few strains of serovar Typhimurium, and one strain of serovar Tennessee are reported to harbor more than two CRISPR arrays<sup>19</sup>. Instead, our analysis confirmed that the CRISPR1 array of serovars Typhimurium and Heidelberg were divided into two parts by a stretch of 74 nucleotides consisting of two truncated spacers and a direct repeat (DR) (supplementary fig. S1A). The two parts of the CRISPR1 array taken together in concatenation aligned well with the intact CRISPR1 array of other strains of serovar Typhimurium. Similarly, the CRISPR1 array of serovar Tennessee strain (str.) CFSAN070645 was divided into three parts (containing 19, 24, and 16 spacers) and the CRISPR2 into two parts (consisting 10 and 11 spacers) due to the presence of mutated DRs rendering a stretch of 91bp undetectable as a part of the CRISPR array. Therefore, we considered the concatenated forms of these CRISPR arrays as a single unit for further analysis. Our analysis also indicated the occurrence of CRISPR1 array with two spacers each, in the serovars Dublin, Gallinarum, Pullorum, and Gallinarum/Pullorum. However, neither of these CRISPR arrays were described as valid in the CRISPR-Cas<sup>++</sup> database, and the CRISPRCasFinder software allocated 27bp long DRs and 34bp long spacer sequences. Likewise, the CRISPR2 arrays of serovar Typhi and serovar Pullorum str. S06004 identified through our analysis were not detectable by this database. The CRISPR2 array of serovar Typhi possessed only one erratic spacer and that of serovar Pullorum str. S06004 had two spacers. We considered all these strains and their respective CRISPR-Cas systems in our analysis.

### ***Protospacer analysis:***

The spacer sequences were extracted from the CRISPR-Cas<sup>++</sup> database. The data of all the strains belonging to one particular serovar was combined. A unique spacer set was created for that serovar. The spacer sequences were then uploaded on CRISPRTarget tool<sup>20</sup>. Genbank Phage, RefSeq-Plasmid and IMGVR databases were selected as the target databases. The parameters for initial BLAST screen in CRISPRTarget were kept default. Output obtained gave the accession number of the protospacer sources corresponding to these spacers. The hits obtained for Genbank Phage and RefSeq-Plasmid had accession numbers corresponding to NCBI. While, the accession number for the hits obtained from IMGVR database corresponds to IMG/VR viral resource. The accession numbers of the protospacer hits obtained were matched across serovars using a customized bash script. Based on these matches a heat map was created.

### ***Mapping 236 spacer- and Cascade-binding sites obtained by ChIP seq of Cas5:***

The ChIP analysis done by Stringer *et al.*<sup>21</sup> revealed 236 binding sites. We mapped these sites on the complete genome (CP001363) available at NCBI and extracted the genes present at these sites. The functions of these gene were checked using UniProt. The genes having role in virulence (with support from literature) are marked in bold in Table S8.

## References:

1. Bogomolnaya, L.M., Tilvawala, R., Elfenbein, J.R., Cirillo, J.D. & Andrews-Polymenis, H.L. Linearized Siderophore Products Secreted via MacAB Efflux Pump Protect *Salmonella enterica* Serovar Typhimurium from Oxidative Stress. *mBio*. **11**(2020).
2. Bearson, B.L. *et al.* Iron regulated genes of *Salmonella enterica* serovar Typhimurium in response to norepinephrine and the requirement of fepDGC for norepinephrine-enhanced growth. *Microbes. Infect.* **10**, 807-16 (2008).
3. Hensel, M., Hinsley, A.P., Nikolaus, T., Sawers, G. & Berks, B.C. The genetic basis of tetrathionate respiration in *Salmonella typhimurium*. *Mol. Microbiol.* **32**, 275-87 (1999).
4. Rodríguez-Morales, O. *et al.* *Salmonella enterica* serovar Typhimurium ompS1 and ompS2 mutants are attenuated for virulence in mice. *Infect. Immun.* **74**, 1398-402 (2006).
5. Coombes, B.K., Brown, N.F., Kujat-Choy, S., Vallance, B.A. & Finlay, B.B. SseA is required for translocation of *Salmonella* pathogenicity island-2 effectors into host cells. *Microbes. Infect.* **5**, 561-70 (2003).
6. Mühlig, A., Kabisch, J., Pichner, R., Scherer, S. & Müller-Herbst, S. Contribution of the NO-detoxifying enzymes HmpA, NorV and NrfA to nitrosative stress protection of *Salmonella* Typhimurium in raw sausages. *Food Microbiol.* **42**, 26-33 (2014).
7. Mariscotti, J.F. & García-del Portillo, F. Genome expression analyses revealing the modulation of the *Salmonella* Rcs regulon by the attenuator IgaA. *J. Bacteriol.* **191**, 1855-67 (2009).
8. Crouch, M.L., Castor, M., Karlinsey, J.E., Kalthorn, T. & Fang, F.C. Biosynthesis and IroC-dependent export of the siderophore salmochelin are essential for virulence of *Salmonella enterica* serovar Typhimurium. *Mol. Microbiol.* **67**, 971-83 (2008).
9. Johnson, R. *et al.* The Type III Secretion System Effector SptP of *Salmonella enterica* Serovar Typhi. *J. Bacteriol.* **199**(2017).
10. López-Garrido, J. & Casadesús, J. Crosstalk between virulence loci: regulation of *Salmonella enterica* pathogenicity island 1 (SPI-1) by products of the std fimbrial operon. *PLoS One*. **7**, e30499 (2012).
11. Tsolis, R.M. *et al.* SspA is required for lethal *Salmonella enterica* serovar Typhimurium infections in calves but is not essential for diarrhea. *Infect. Immun.* **68**, 3158-63 (2000).
12. El Hag, M. *et al.* Contribution of the csgA and bcsA genes to *Salmonella enterica* serovar Pullorum biofilm formation and virulence. *Avian. Pathol.* **46**, 541-547 (2017).
13. Choi, E. *et al.* Elongation factor P controls translation of the mgtA gene encoding a Mg. *Microbiologyopen*. **8**, e00680 (2019).
14. Velayudhan, J. *et al.* Distinct roles of the *Salmonella enterica* serovar Typhimurium CyaY and YggX proteins in the biosynthesis and repair of iron-sulfur clusters. *Infect. Immun.* **82**, 1390-401 (2014).
15. Tamayo, R., Prouty, A.M. & Gunn, J.S. Identification and functional analysis of *Salmonella enterica* serovar Typhimurium PmrA-regulated genes. *F.E.M.S. Immunol. Med. Microbiol.* **43**, 249-58 (2005).
16. Ledebor, N.A., Frye, J.G., McClelland, M. & Jones, B.D. *Salmonella enterica* serovar Typhimurium requires the Lpf, Pef, and Tafi fimbriae for biofilm formation on HEp-2 tissue culture cells and chicken intestinal epithelium. *Infect. Immun.* **74**, 3156-69 (2006).
17. Clayton, D.J. *et al.* Analysis of the role of 13 major fimbrial subunits in colonisation of the chicken intestines by *Salmonella enterica* serovar Enteritidis reveals a role for a novel locus. *B.M.C. Microbiol.* **8**, 228 (2008).
18. Waskom, M. mwaskom/seaborn. *Zendo* <https://doi.org/10.5281/zenodo.592845> (2020).
19. Couvin, D. *et al.* CRISPRCasFinder, an update of CRISRFinder, includes a portable version, enhanced performance and integrates search for Cas proteins. *Nucleic Acids Res.* **46**, W246-W251 (2018).
20. Shariat, N., Timme, R.E., Pettengill, J.B., Barrangou, R. & Dudley, E.G. Characterization and evolution of *Salmonella* CRISPR-Cas systems. *Microbiology*. **161**, 374-86 (2015).
21. Biswas, A., Gagnon, J.N., Brouns, S.J., Fineran, P.C. & Brown, C.M. CRISPRTarget: bioinformatic prediction and analysis of crRNA targets. *RNA Biol.* **10**, 817-27 (2013)
22. Stringer, A.M., Baniulyte, G., Lasek-Nesselquist, E., Seed, K.D. & Wade, J.T. Transcription termination and antitermination of bacterial CRISPR arrays. *Elife*. **9**(2020)
